# Supplementary material for: Gut Microbiomes of Indian Children of Varying Nutritional Status
Source: PubMed Central journal article supplement (PMC3999041; doi:10.1371/journal.pone.0095547), 2014-04-24
Supplement: pone.0095547.s001.pdf [file pone.0095547.s001.pdf]

1 **Supporting Information S1**

2 **Details of study population, sample collection, DNA extraction, pyrosequencing and quality**  
3 **filtering**

4 **Study population**

5 In Birbhum district, West Bengal, India, the population demography and socio-economic  
6 characteristics, human development and health indices are typical of rural and agriculture  
7 dependent West Bengal. The Birbhum population project (BIRPOP), established in 2008, is a  
8 health and demographic surveillance system (HDSS; [http://www.shds.in/about\\_us.html](http://www.shds.in/about_us.html)) that  
9 involves longitudinal observation and analysis in the context of a systematically organized  
10 population cohort of c.a. sixty thousand residents. To determine how malnutrition affects gut  
11 microbiome composition and function, 20 children of varying nutritional status (from apparently  
12 healthy to ones suffering from various anthropometric failure, for example, either wasted,  
13 stunted or underweight) were selected as study subjects from this population. All subjects were  
14 aged less than or equal to 60 months. They had no history of diarrhea or any acute respiratory  
15 infection or had consumed any antibiotics for a period of at least four weeks before fecal sample  
16 collection. Z-scores were calculated for each of these subjects before enrolling them in the study.  
17 Children with at least two of the three measured Z-scores lying above the level of median minus  
18 twice the standard deviation values were considered as healthy [1], and subjects having all three  
19 Z-score values below this were considered as malnourished. Subjects with at least two of the  
20 measured Z-score values falling below the level of median minus thrice the standard deviation  
21 and the third Z-score value below level of median minus twice the standard deviation were  
22 grouped as subjects with severe acute malnutrition.

## 1 **Sample collection and DNA extraction**

2 Faecal samples from 20 children under study were collected aseptically in sterile stool  
3 containers and transported to the laboratory in dry ice within 6-8 hours of collection. Total  
4 bacterial DNA was extracted from 200mg of each faecal sample using the QIAamp DNA Stool  
5 Mini Kit (Qiagen, USA) using the manufacturers protocol. To ensure maximum lysis of bacterial  
6 cells, samples were lysed by mechanical disruption using 0.1mm Zirconium beads and a mini  
7 bead beater (BioSpec Products, Inc., USA).

## 8 **Quality assessment and quantitation of genomic DNA**

9 The quality and DNA concentration of each of the samples were assessed using  
10 NanoDrop ND1000 spectrophotometer (Thermo Scientific, USA) and 0.8% agarose gel  
11 electrophoresis. Samples with  $OD_{260}/OD_{280}$  ratio  $\geq 1.8$ ,  $OD_{260}/OD_{230}$  ratio  $\geq 1.9$ , DNA  
12 concentration between 250 to 500ng/ $\mu$ L and with no visible evidence of contaminating RNA or  
13 DNA degradation, were used for library preparation for whole genome sequencing.

## 14 **Library preparation**

15 DNA from each of the samples was subjected to Rapid Library preparation protocol for  
16 GS FLX sequencing by Titanium chemistry (Roche, USA). Briefly, about 1  $\mu$ g of genomic DNA  
17 was nebulized by nitrogen gas at a pressure of 30 psi for 1 minute for obtaining DNA fragments  
18 of length 500-900 base pairs (bps). The nebulized DNA was purified by MinElute PCR  
19 Purification kit (Qiagen, USA), end polished with T4 DNA Polymerase, Polynucleotide Kinase  
20 and Taq DNA Polymerase (Roche, USA) by incubating at 25°C for 20 minutes and 72°C for 20  
21 minutes. This was followed by ligation of library adapter oligonucleotides using DNA Ligase

1 (Roche, USA) and incubating at 25°C for 10 minutes. The genomic DNA libraries thus obtained  
2 were then purified by Ampure XP (Beckman Coulter, USA). The DNA libraries were analyzed  
3 using DNA High Sensitivity Chip in 2100 Bioanalyzer (Agilent, USA) and quantified using  
4 Picogreen dye in QubitFluorometer(Invitrogen, USA) and NanoDrop.

## 5 **Whole genome sequencing**

6 About  $140 \times 10^7$  DNA library molecules per sample were clonally amplified by emulsion  
7 PCR in ABI 9700 PCR systems (Invitrogen, USA), purified using REme integration (Roche,  
8 USA) on Biomek 3000 (Beckman Coulter, USA) and pyrosequenced in pico-titre plates in GS-  
9 FLX Genome Sequencers (Roche, USA). For sequencing, one pico-titre plate was used per  
10 sample. Sequence reads in FASTQ format were obtained from SFF files using sffinfo (GS-FLX)  
11 and a Linux script developed in-house. The sequence data generated per run were evaluated by  
12 FASTQC (<http://www.bioinformatics.babraham.ac.uk/projects/fastqc/>), using default parameters.

## 13 **Quality filtering**

14 In order to retain only the high quality reads in each metagenome, sequence reads having  
15 lengths less than 75 bps and at least one base with PHRAP quality scores less than 20, were  
16 removed from the metagenomic datasets.

## 17 **Removal of host contamination**

18 Sequences originating from host DNA were removed by first detecting probable host  
19 contaminating sequences using Eu-Detect [2] and then performing a BLASTN search (with

1 threshold identity >95% and query coverage >90%) of this subset against the Human Genome  
2 v19.

### 3 **References**

4 1. FAO (1992) World Food Supplies and Prevalence of Chronic Undernutrition in Developing  
5 Regions As Assessed in 1992. Rome: FAO, Rome.

6 2. Mohammed MH, Chadaram S, Komanduri D, Ghosh TS, Mande SS (2011) Eu-Detect: an  
7 algorithm for detecting eukaryotic sequences in metagenomic data sets. J Biosci 36: 709-717.

## 1 **Supporting Information S4**

### 2 **Profiling the abundances of carbohydrate active enzyme families and virulence factors in** 3 **the gut microbiomes**

4 Putative homologs of carbohydrate active enzymes (CAZymes) present in the 20 gut  
5 microbiomes were identified by performing a BLASTN search of the metagenomic datasets  
6 against the CAZymes present in the CAZy database (<http://www.cazy.org/>.accessed on 2 August  
7 2013) [1]. Sequences in each metagenome having the best BLAST hit (with e-value < 1e-06 and  
8 nucleotide identity  $\geq$  65%) were retained.

9 For each metagenome, the number of significant hits to each CAZyme family was first  
10 obtained. This number was subsequently divided by the number of reads in the metagenome and  
11 was represented in the form of an 'Abundance Matrix'. In order to remove the effect of sampling  
12 bias across the 20 gut metagenomes, the 'Relative Homolog Abundances' (RHA) of each  
13 CAZyme family was calculated as follows:

14 
$$\text{RHA} = \left[ \frac{\text{Number of CAZymes in a family in a given sample}}{\text{Total number of CAZymes in a}} \right. \\ \left. \text{given sample} \right] * 100$$

16 For the purpose of comparison, the RHA of each CAZyme family was then cross-  
17 normalized across the 20 metagenomes and represented as Z-scores. A heat map representing the  
18 normalized RHA values across the different gut metagenomes was generated (using the  
19 heatmap2 module of R statistical package) in order to identify CAZyme families which were  
20 significantly correlated with the overall nutritional status. For generating the heat map, while the  
21 CAZyme families were clustered using Agglomerative Clustering Algorithm (Ward's Method)  
22 [2], the samples were arranged in the increasing order of overall nutritional index.

1           In order to obtain a better resolution for the heatmap, CAZyme families showing similar  
2 abundance profiles across the 20 microbiomes were clustered into groups. The RHA of each  
3 group was computed by cumulating the abundances of the CAZyme families within each group.  
4 For each group, the RHA values were subsequently rank normalized across the 20 microbiomes.  
5 These ranks were then range-scaled from 0 to 1. The range-scaled ranks were then plotted in the  
6 form of a heat map, with samples arranged in increasing order of the overall nutritional index  
7 and the groups of CAZyme families re-clustered using Ward's method [2].

8           In order to identify groups of CAZyme families that showed significant correlation  
9 (positive or negative) with nutritional indices, Pearson's Correlation coefficients were calculated  
10 between the range-scaled ranks and the nutritional indices of the children. Groups of CAZyme  
11 families with significant correlation coefficients ( $P$ -value  $< 0.05$ ) were then identified.

## 12 **Profiling the abundance of virulence genes in the gut microbiomes**

13           Sequences corresponding to the homologs of virulence factors were downloaded from  
14 Virulence Factor (VF) database (<http://www.mgc.ac.cn/VFs> accessed on 2 August 2013) [3].  
15 Similarity searches of sequences in each gut metagenome were performed using BLASTx  
16 against the database of VF homologs. In each metagenome, VFs having at least 70% of their  
17 lengths covered in alignments (with identity  $>70\%$  and query coverage  $>80\%$ ) were identified.  
18 The overall abundance of VFs in a given microbiome was then computed by normalizing the  
19 number of VFs detected in a given metagenome by the number of sequences in the  
20 corresponding metagenome.

## 21 **References**

22 1. Cantarel BL, Coutinho PM, Rancurel C, Bernard T, Lombard V, et al. (2009) The

- 1 Carbohydrate-Active EnZymes database (CAZy): an expert resource for Glycogenomics.
- 2 Nucleic Acids Res 37: D233-238.
- 3 2. Joe H. Ward J (1963) Hierarchical Grouping to Optimize an Objective Function. Journal of the
- 4 American Statistical Association 58: 236-244.
- 5 3. Chen L, Yang J, Yu J, Yao Z, Sun L, et al. (2005) VFDB: a reference database for bacterial
- 6 virulence factors. Nucleic Acids Res 33: D325-328.

1 **Supporting figure legends**

2 **Figure S1.**

3 Multivariate analysis of the 20 gut microbiomes using (A) Principal Component Analysis (PCA)  
4 with both PC1 v/s PC2 as well as PC1 v/s PC3 and (B) Principal Least Square Discriminant  
5 Analysis (PLS-DA).

6 In (A), Apparently Healthy (AH), Borderline (BL) and Severely Malnourished (SM) gut  
7 microbiomes are denoted as Green triangles, Orange squares and Blue rounds, respectively.

8 In (B), Apparently Healthy (AH), Borderline (BL) and Severely Malnourished (SM) gut  
9 microbiomes are denoted as Red, Green and Blue dots, respectively.

10 **Figure S2.**

11 Abundance patterns of various CAZyme subfamilies across varying nutritional status. The  
12 parent node (under which all the child nodes are clustered) are marked with “\*”. The group  
13 numbers are demarcated in the right margin.

14 **Figure S3.**

15 Variation of abundance of virulence factors across groups of microbiomes with varying  
16 nutritional status. AH represents microbiomes from apparently healthy individuals, BL  
17 represents individuals with borderline malnourishment and SM represents severely malnourished  
18 individuals.

19



1 **Figure S4.**

2 Genera co-occurrence network for fourteen overlapping windows (1 to 14) of gut metagenomes

3 with decreasing nutritional index.

Figure S1.

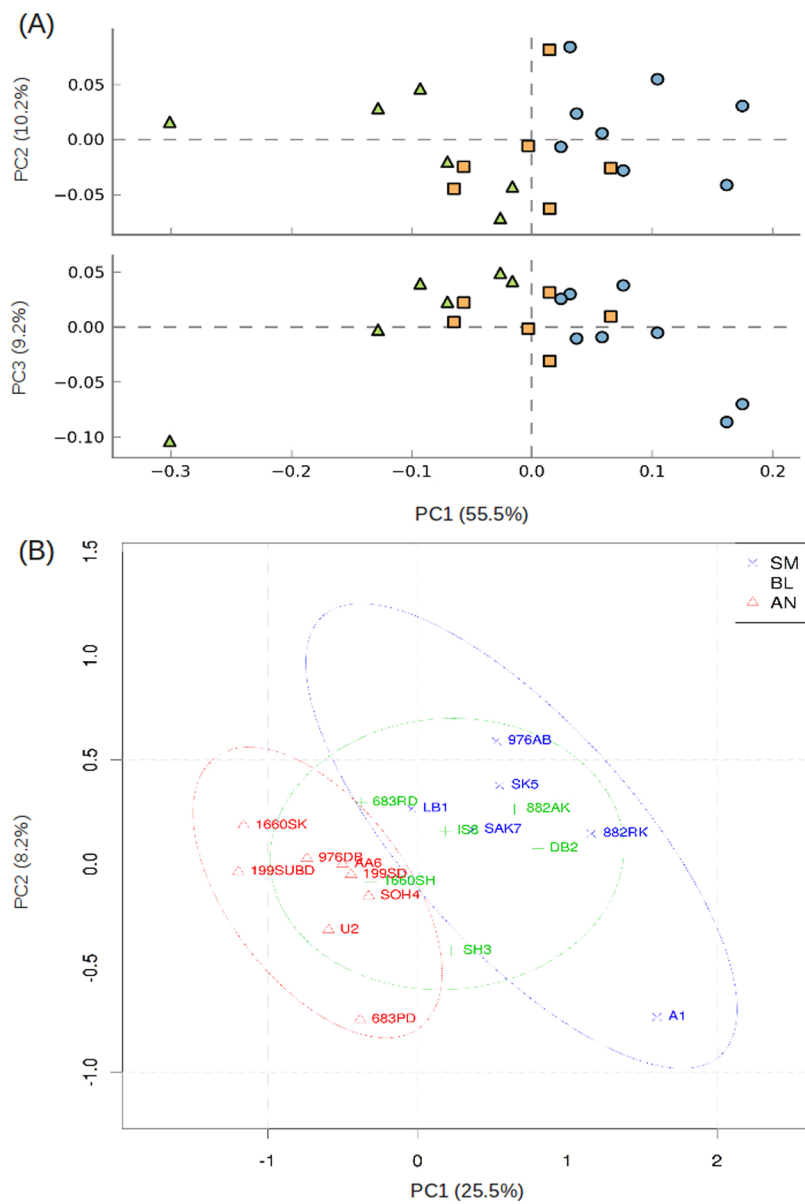

Figure S 2.

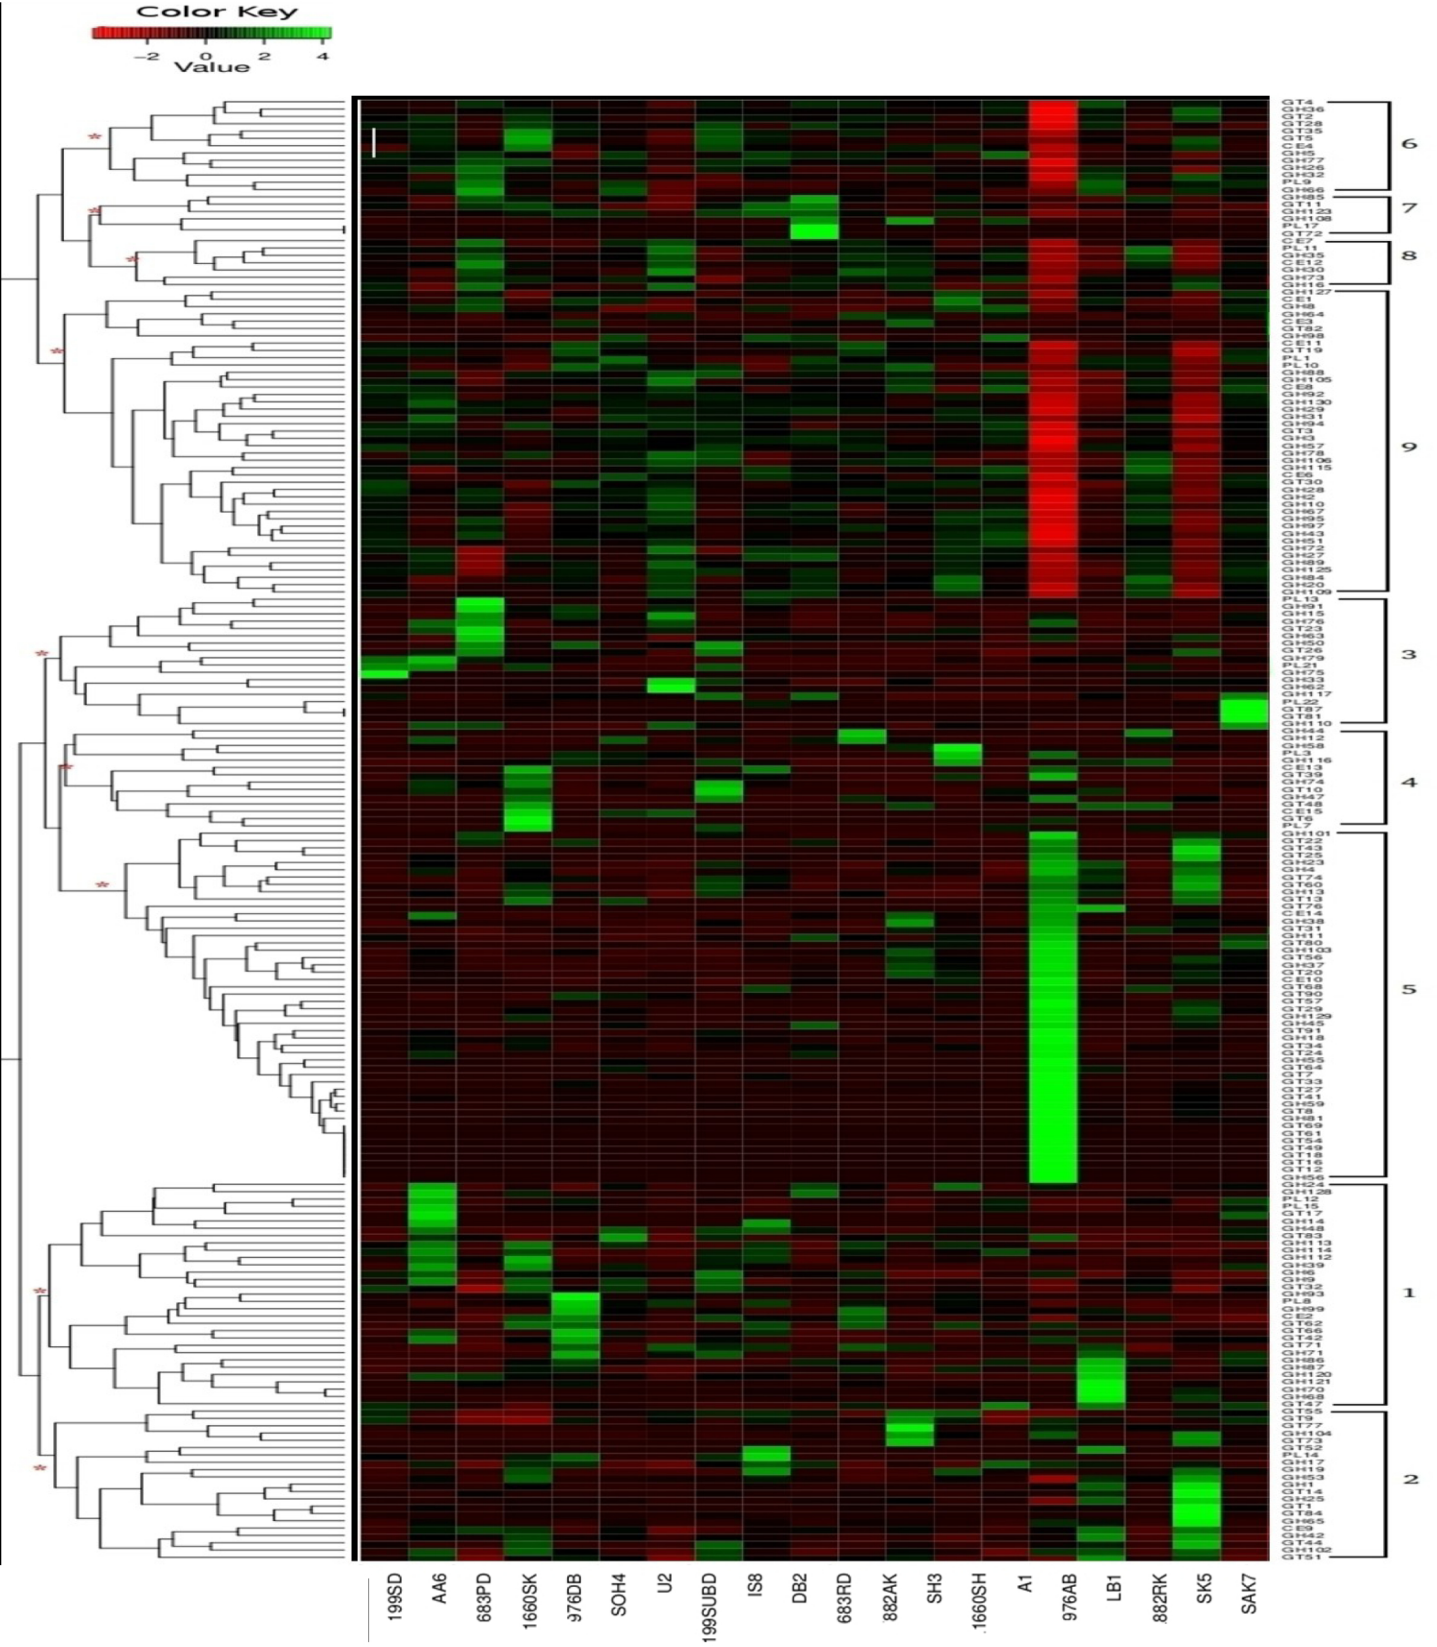

Figure S3.

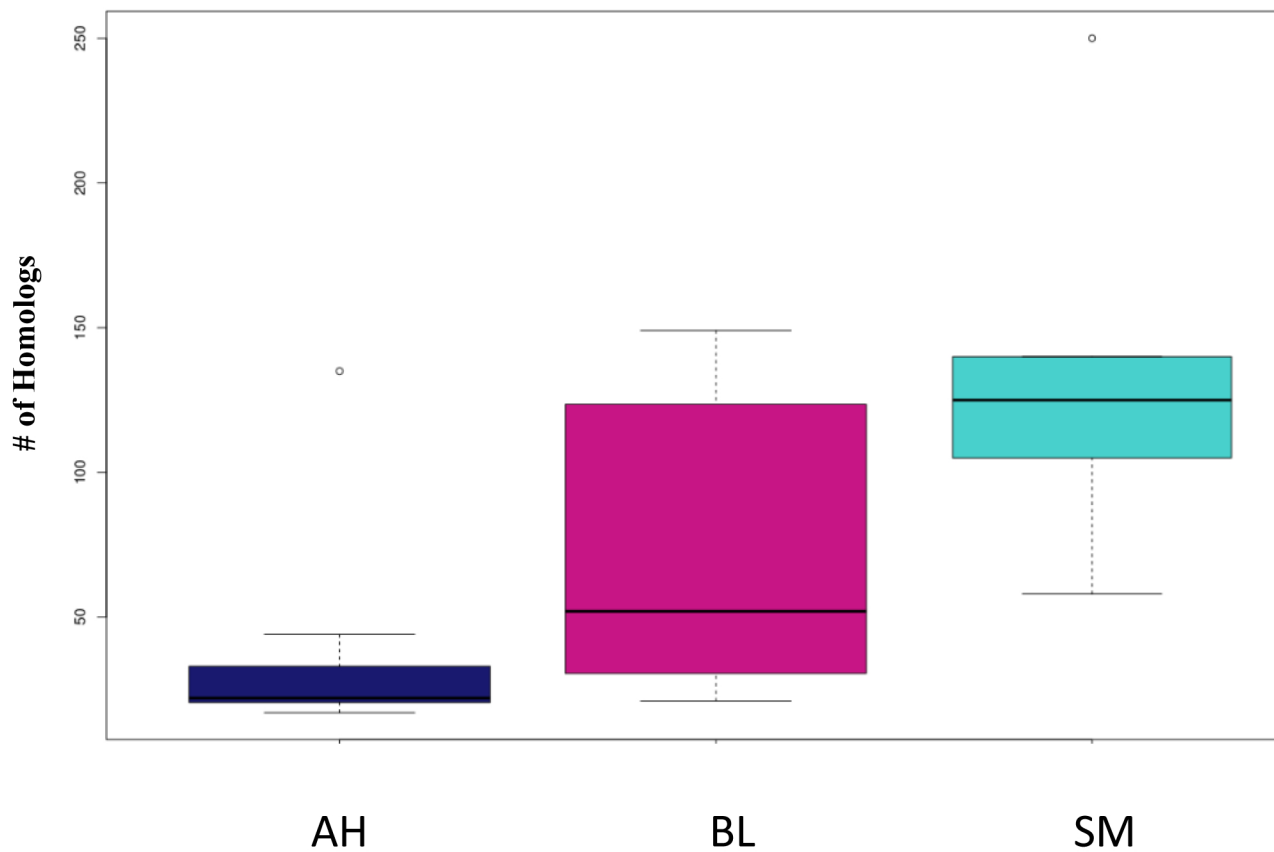

Figure S4.

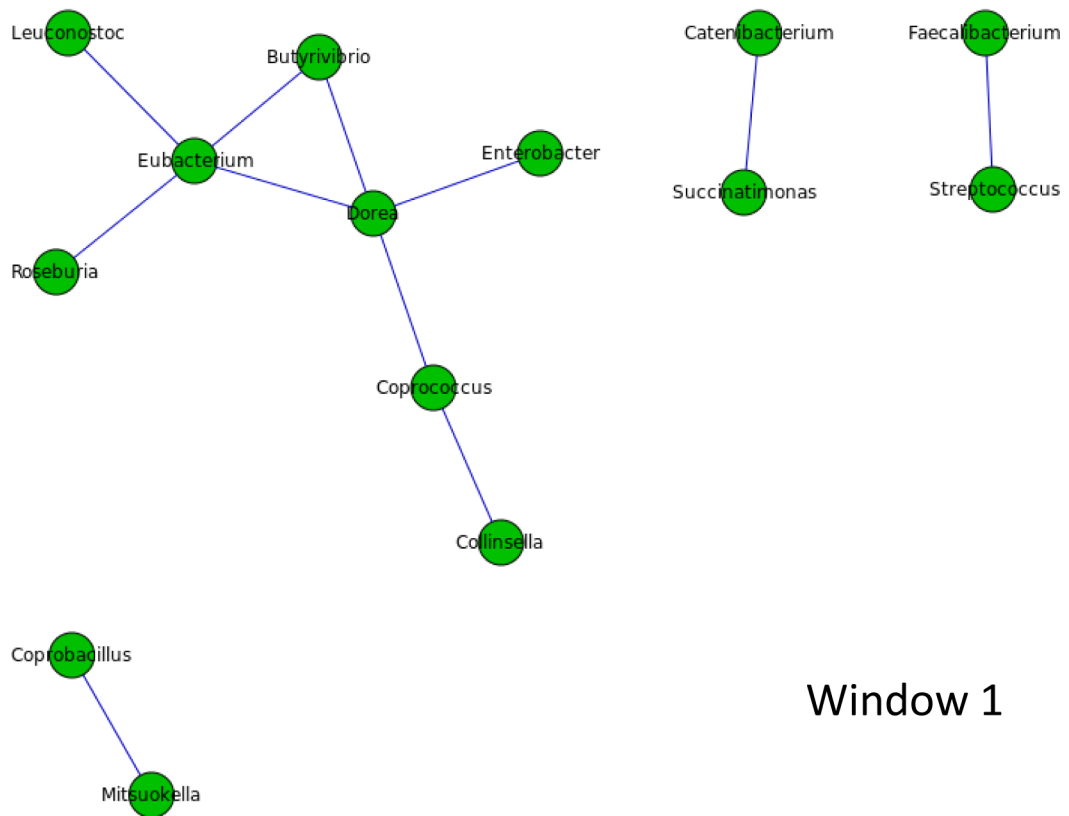

Window 1

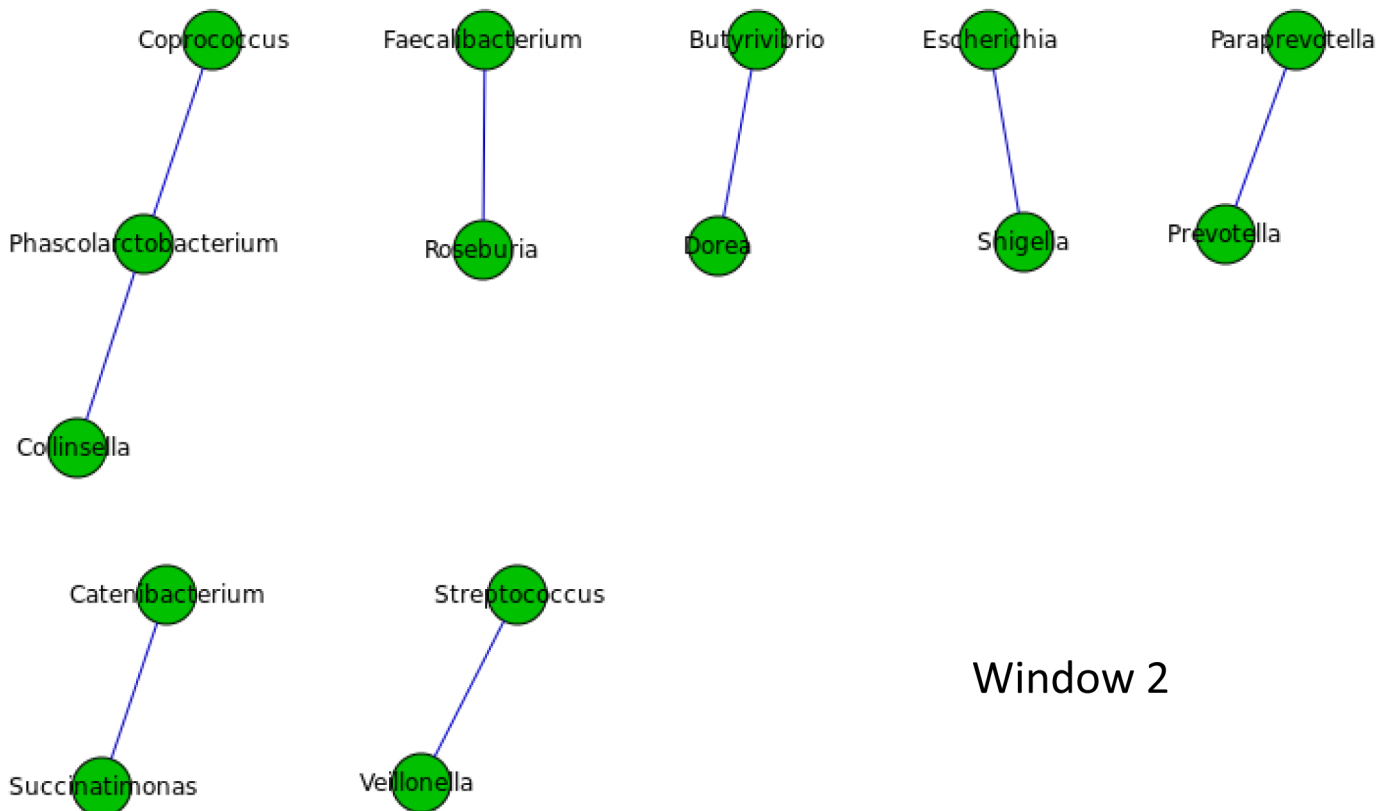

Window 2

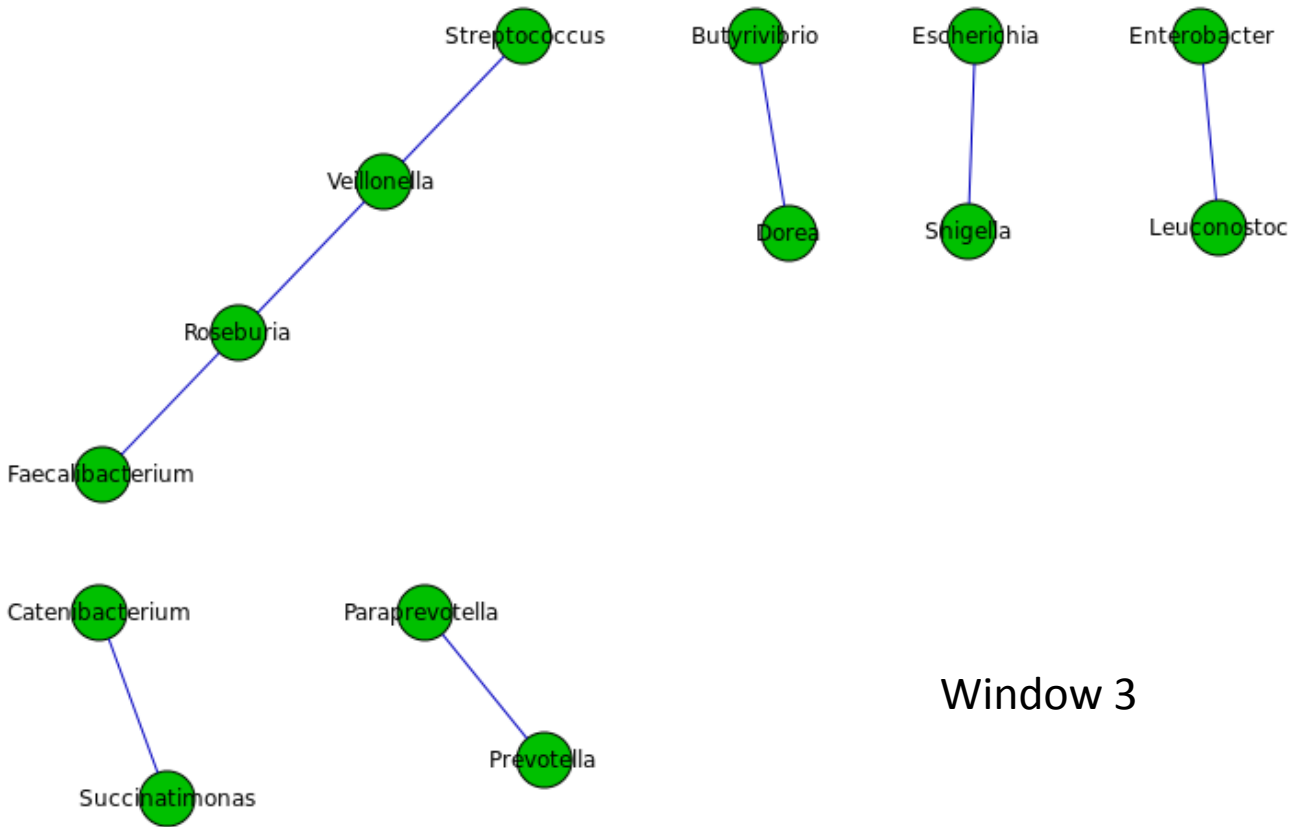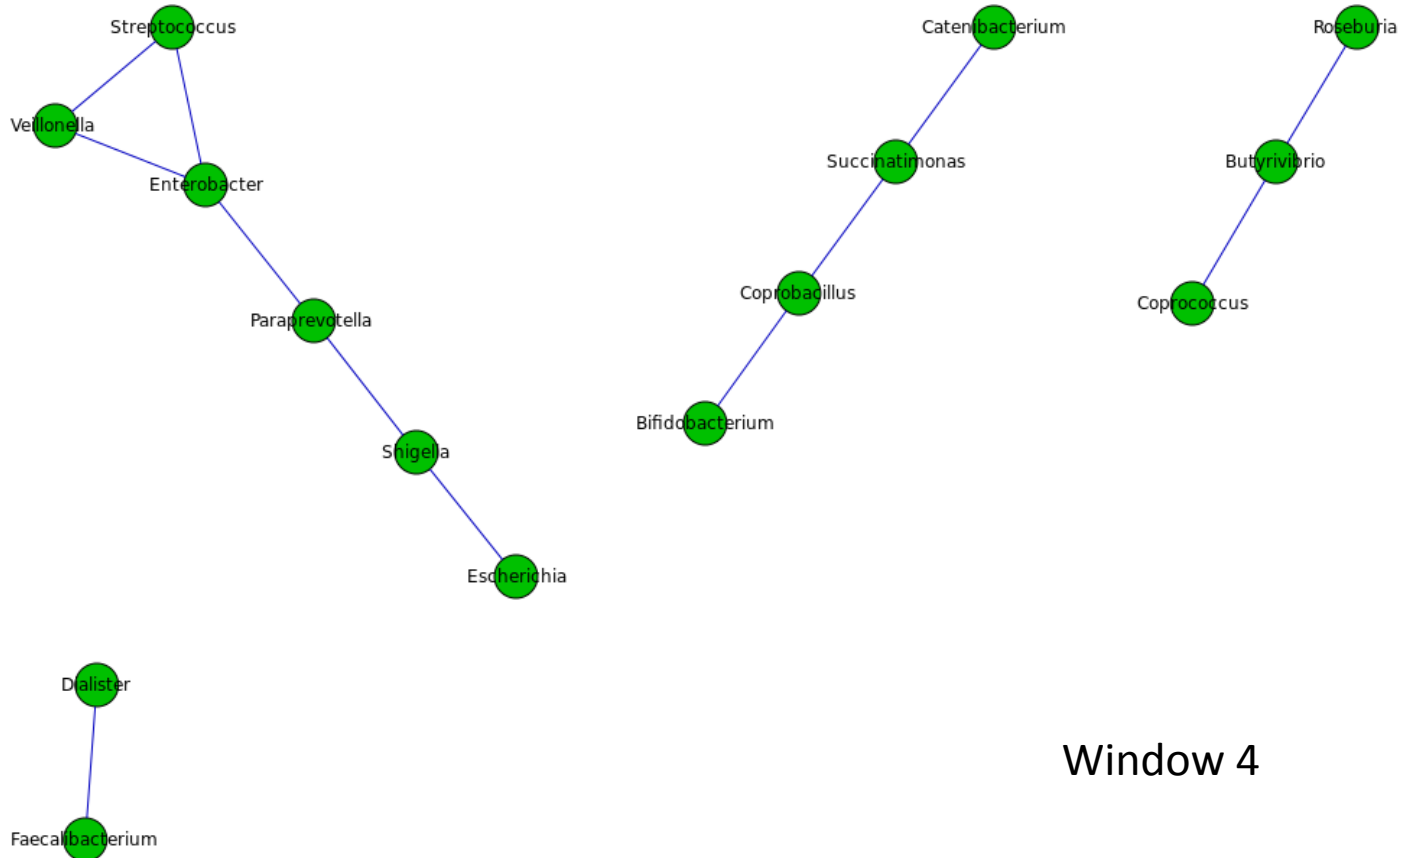

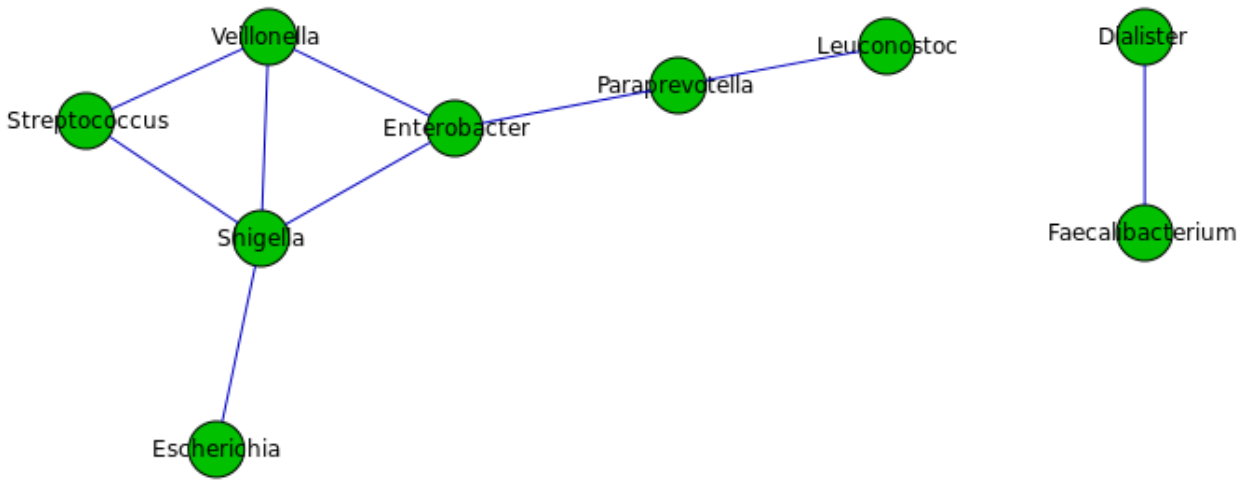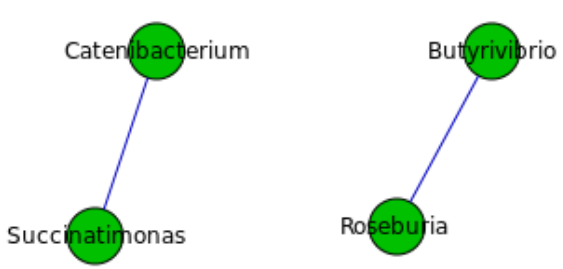

Window 5

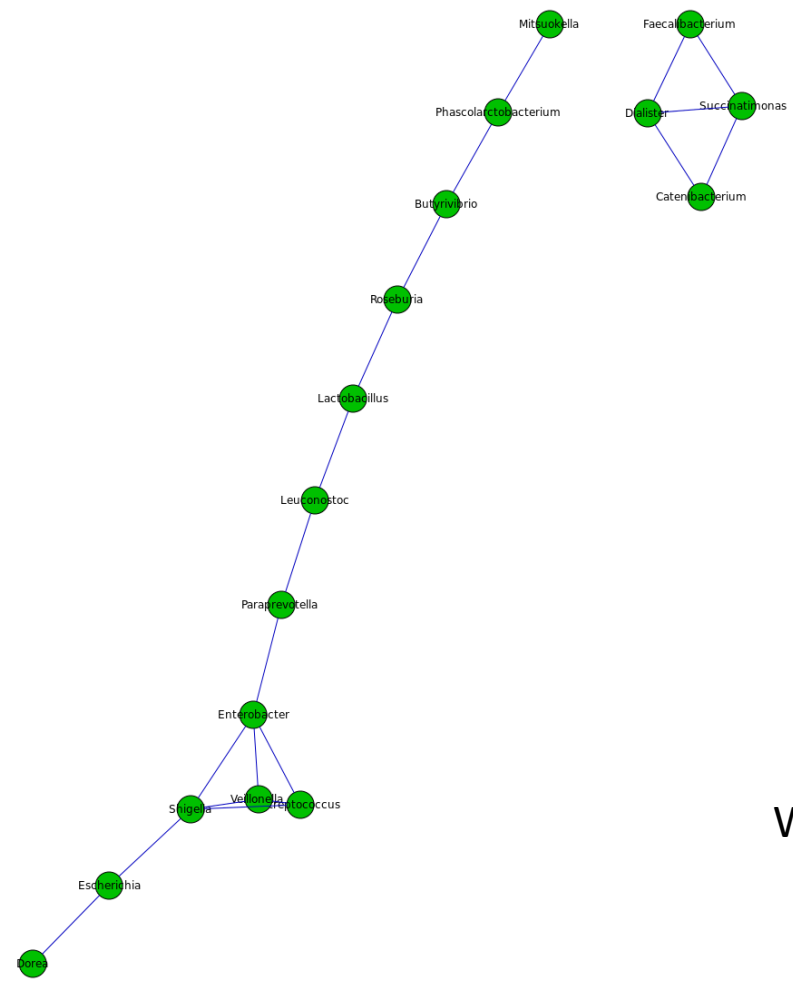

Window 6

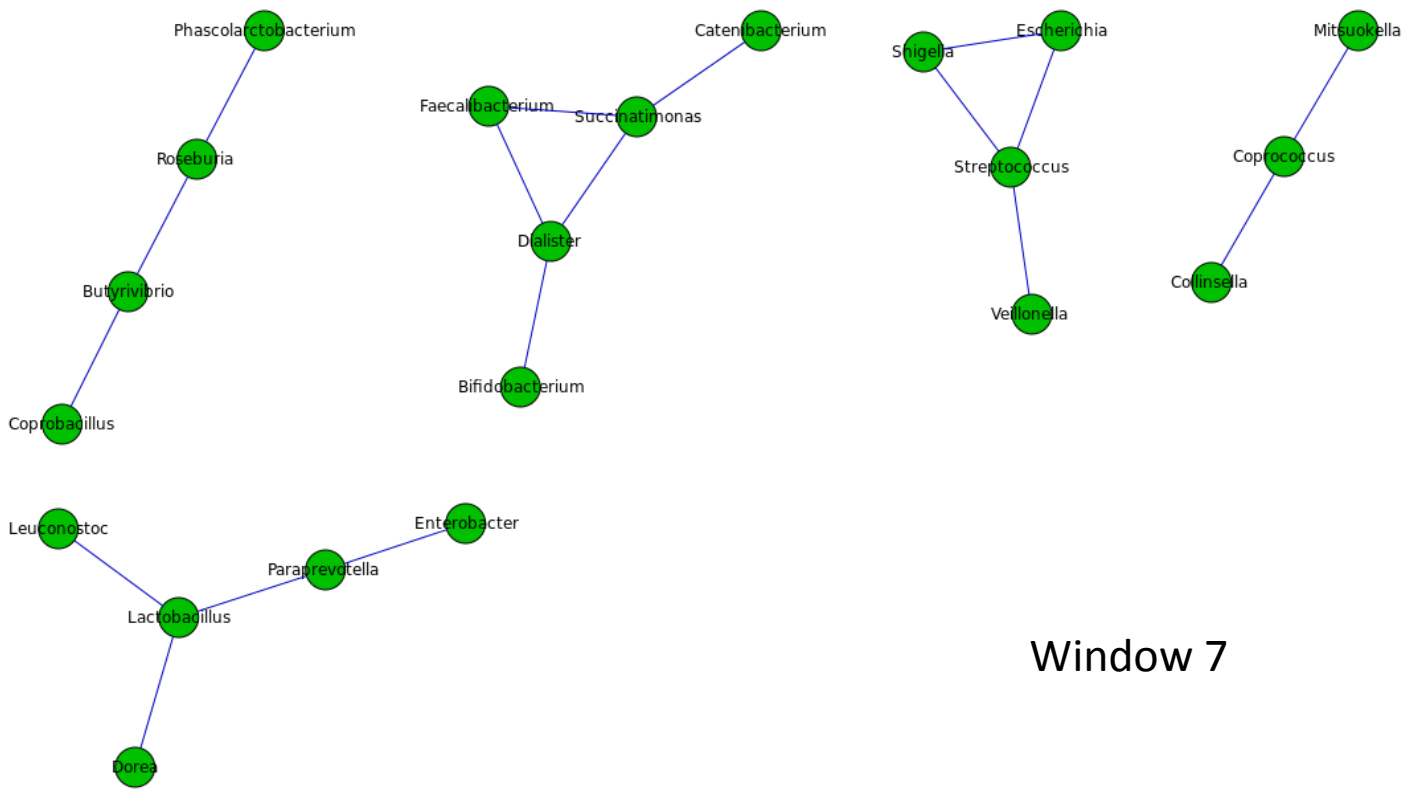

Window 7

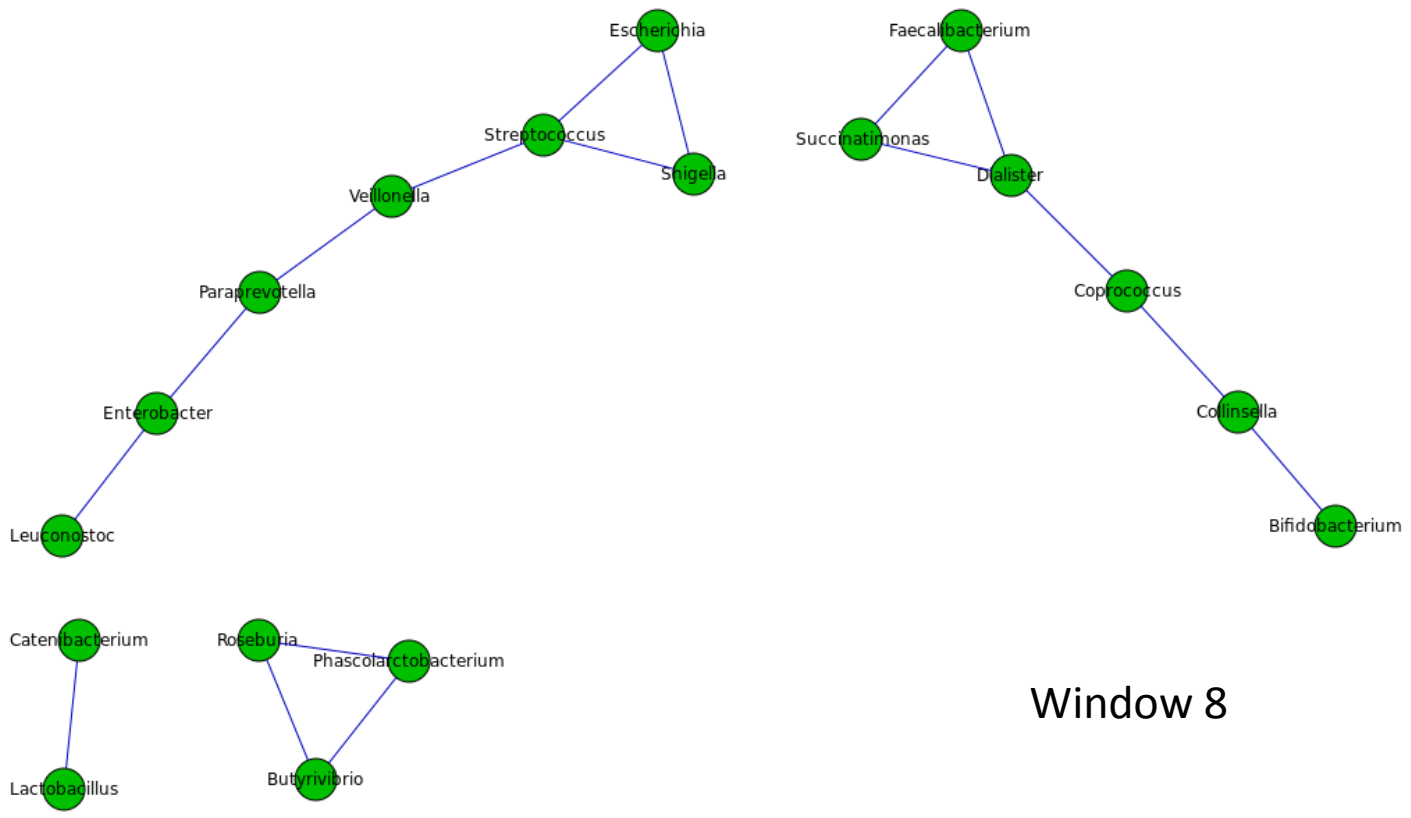

Window 8



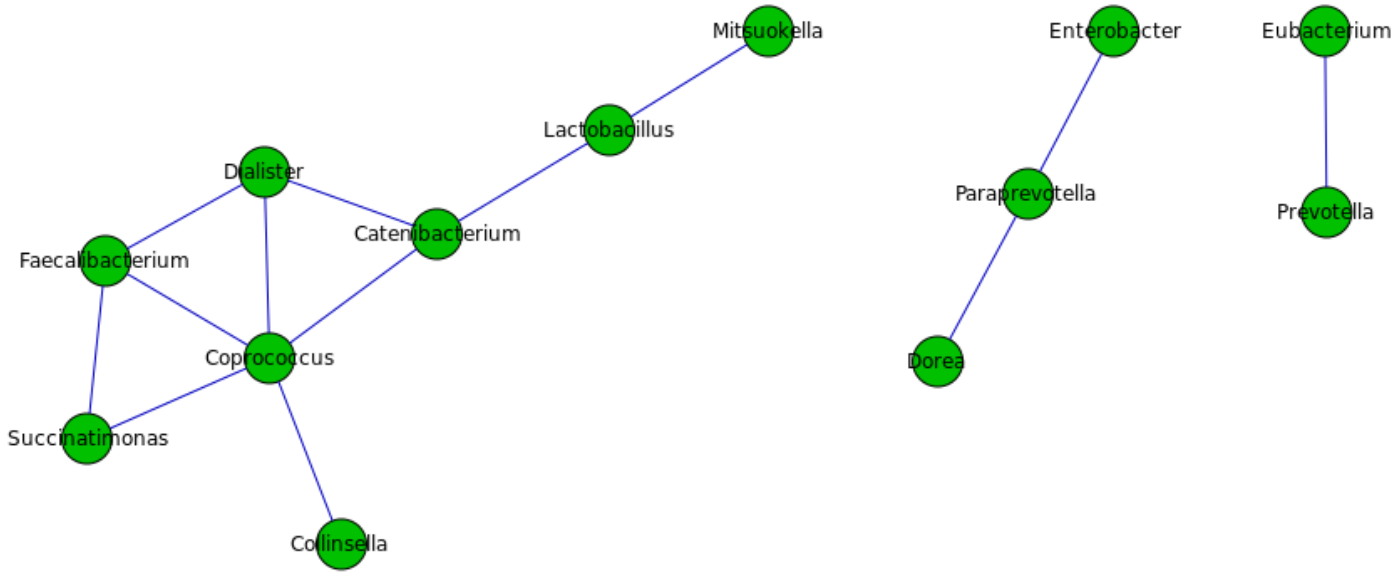

Window 9

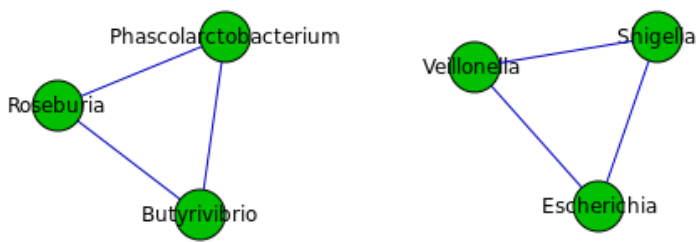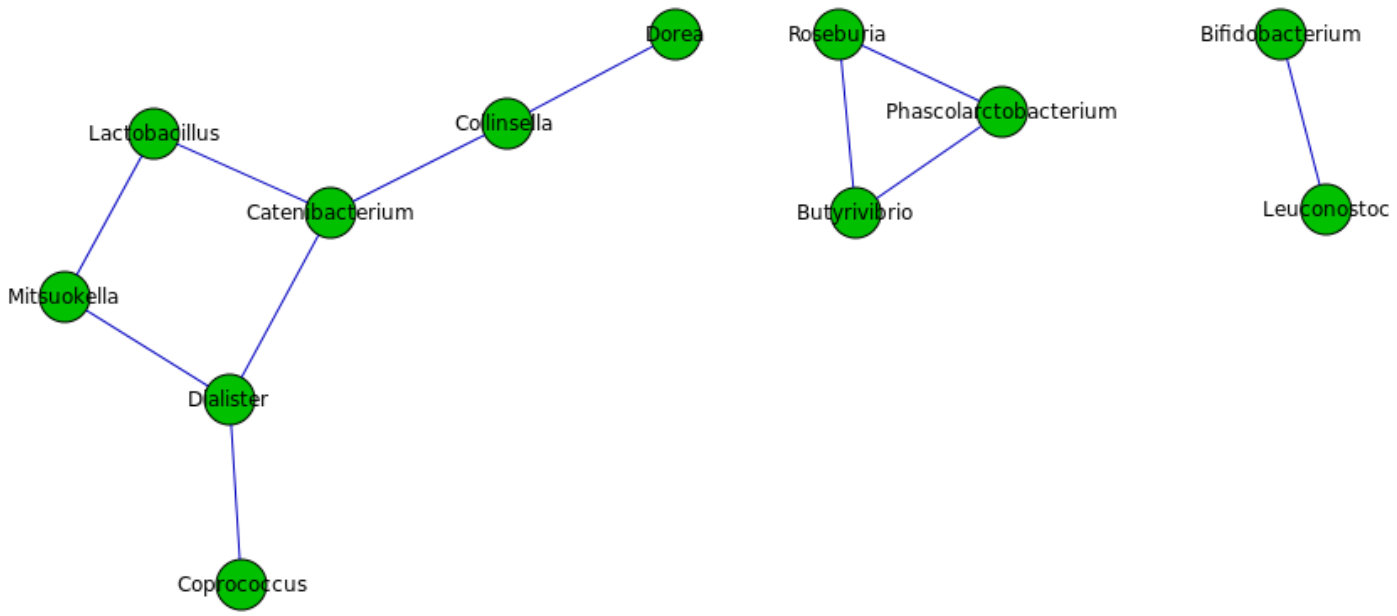

Window 10

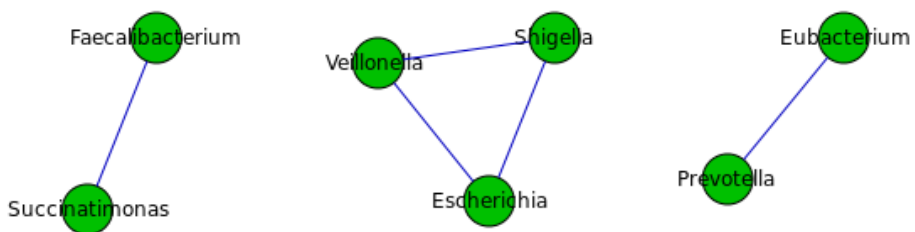

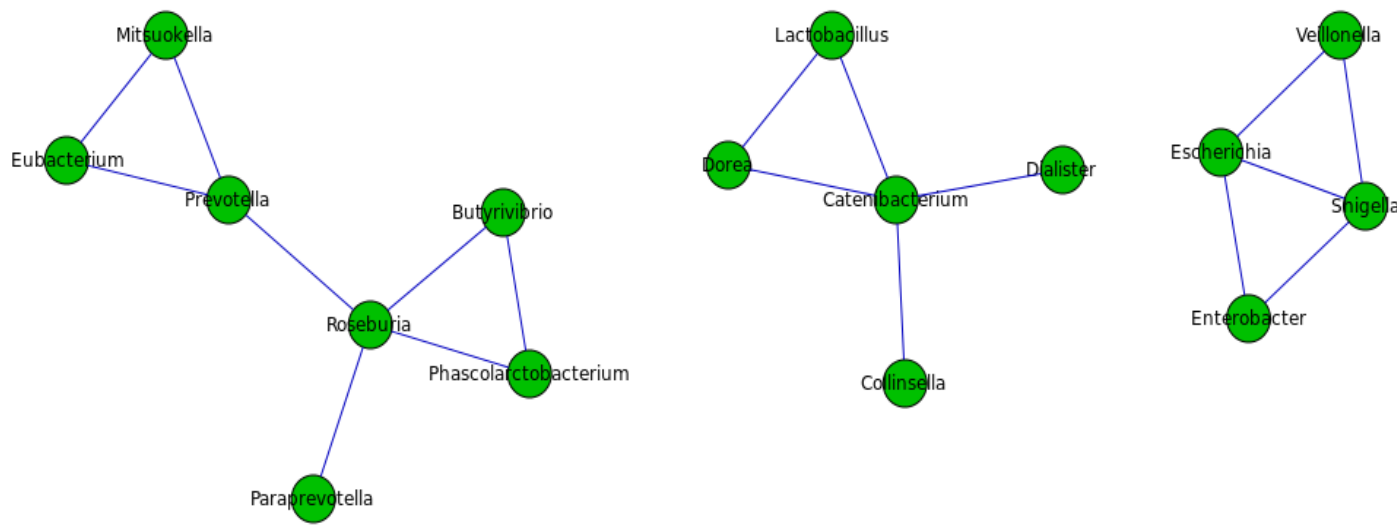

Window 11

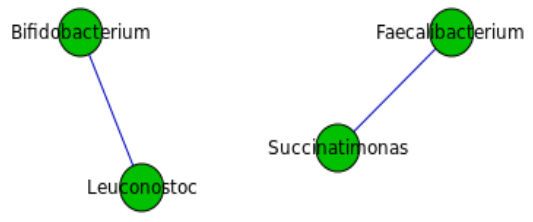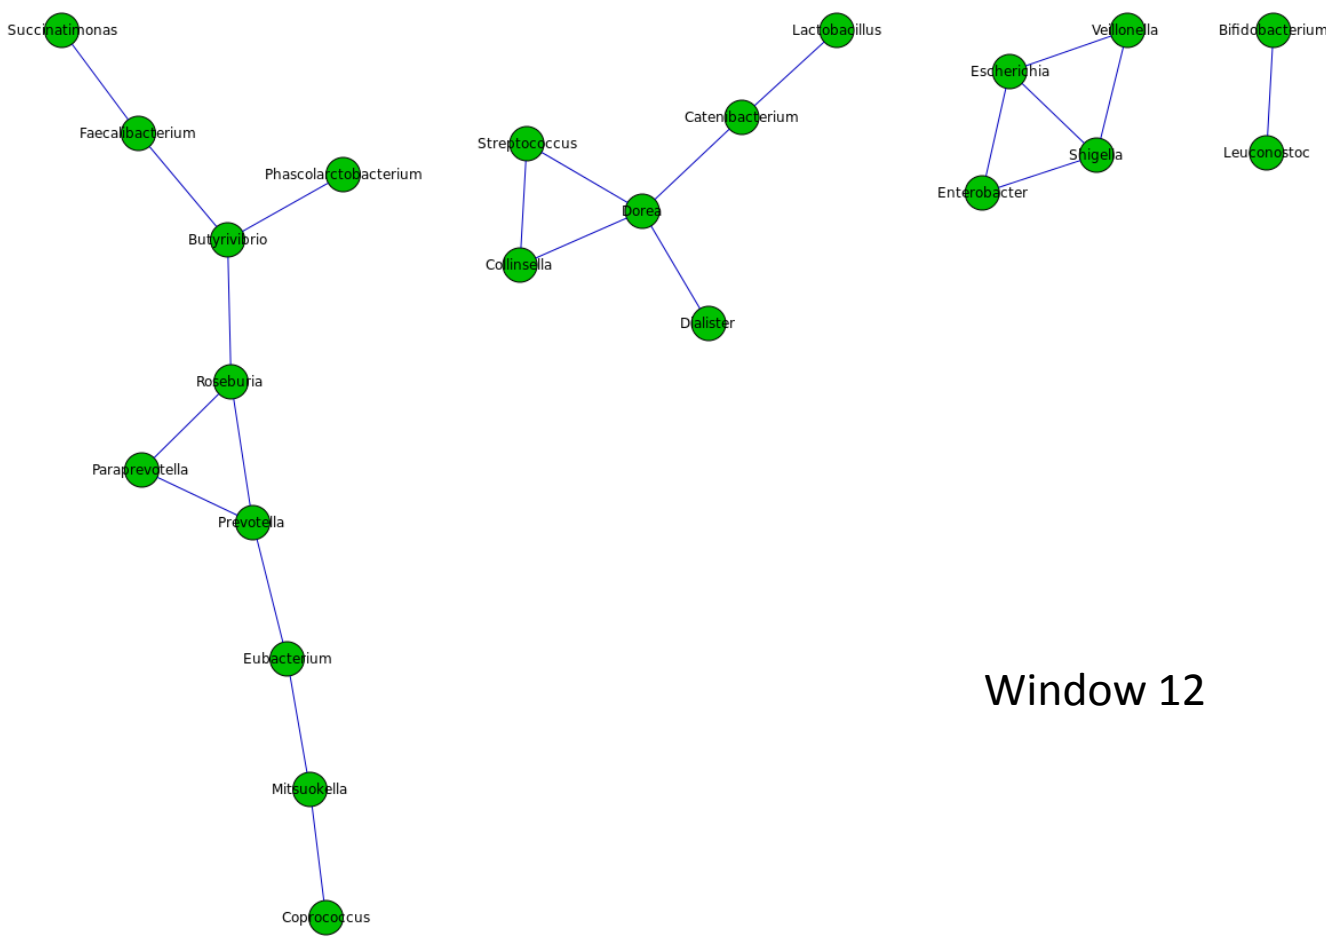

Window 12

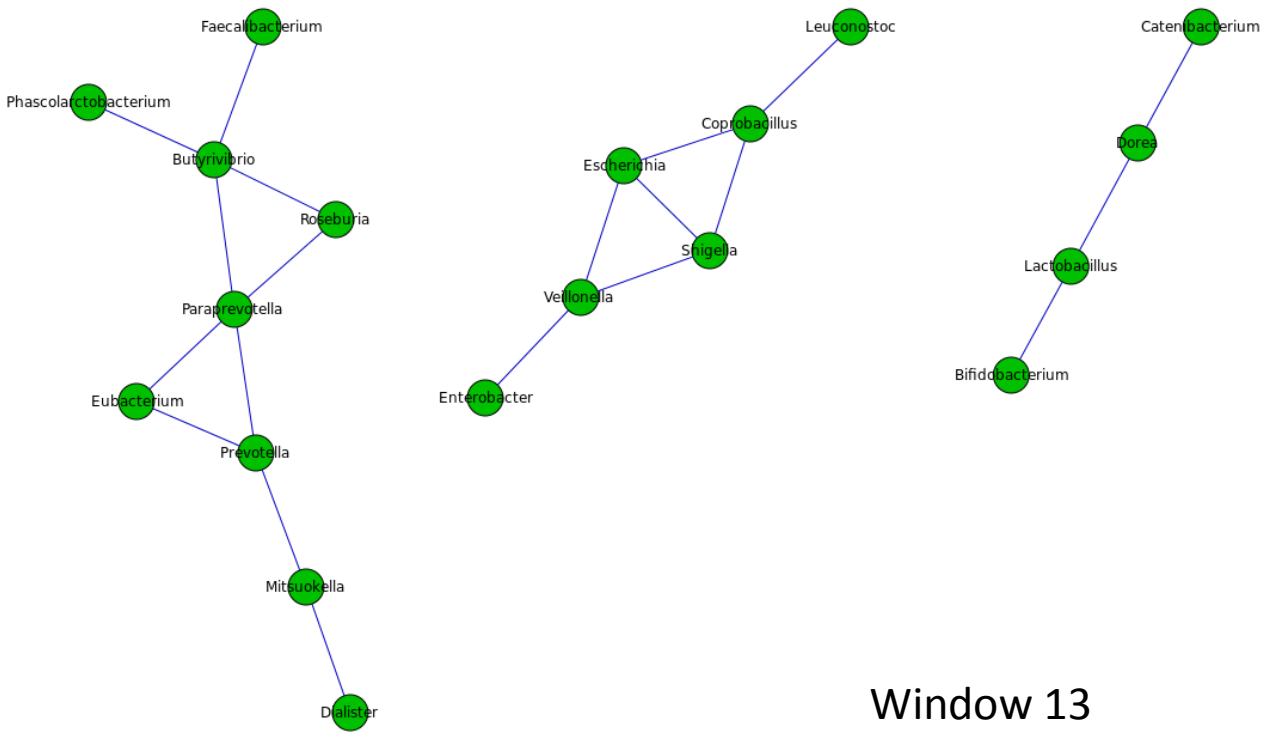

Window 13

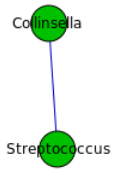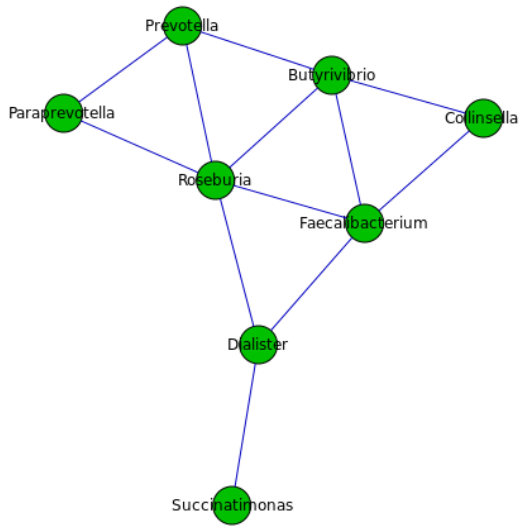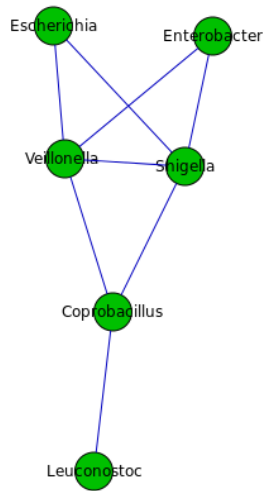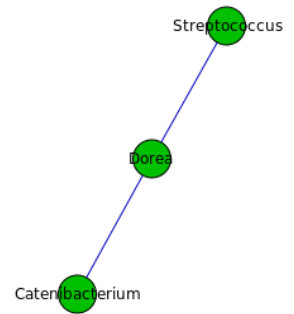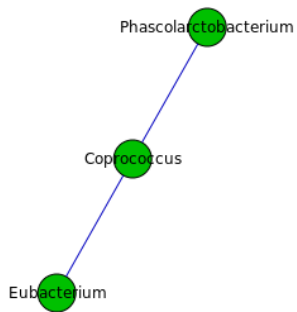

Window 14

1 **Supplementary Table legends**

2 **Table S1.**

3 Formulae used for the calculations of the various Z-scores for the 20 children.

4 **Table S2.**

5 Anthropometric data and sample data corresponding to the 20 children under study.

6 **Table S3.**

7 Percentages of sequences assigned to taxa at various levels across the 20 gut microbiomes.

8 **Table S4.**

9 Normalized abundances of various taxonomic groups at the (A) Genus, (B) Family, (C) Order,  
10 (D) Class and (E) Phylum.

11 **Table S5.**

12 Rank normalized abundances of various taxonomic groups at the (A) Genus, (B) Family, (C)  
13 Order, (D) Class and (E) Phylum.

14 **Table S6.**

15 Correlations of the different nutritional indices with the rank normalized abundances of various  
16 taxonomic groups at the levels of (A) Genus, (B) Family, (C) Order, (D) Class and (E) Phylum.

17 Note that groups having a statistically significant positive or negative correlation with any one of

1 the nutritional indices have been highlighted in green and orange colors respectively, along with  
2 the corresponding Power values (both at  $P < 0.01$  and  $P < 0.05$ ), ReBOOT Z-values as well as the  
3 P-values computed using the ReBOOT method. The corresponding correlation values with a  
4 nutritional index have been indicated in \*.

5 **Table S7.**

6 (A) Analysis of Variance (ANOVA) with multiple test correction (Benjamini-Hochberg FDR)  
7 and Post-hoc analysis of differences in pair of means using Tukey-Kramer's test.

8 (B) Kruskal-Wallis H-Test with Multiple test correction (Benjamini-Hochberg FDR) and Post-  
9 hoc analysis of differences in pair of means using Tukey-Kramer's test.

10 **Table S8.**

11 List of COGs (along with their correlation values) whose rank normalized abundances positively  
12 correlated with cumulative nutritional indices (Z-score) with a P-value  $< 0.05$  (ReBoot Z-value  $<$   
13  $-1.97$ ).

14 **Table S9**

15 List of COGs (along with their correlation values) whose rank normalized abundances negatively  
16 correlated with cumulative nutritional indices (Z-score) with a P-value  $< 0.05$  (ReBOOT Z-value  
17  $< -1.97$ ).

18 **Table S10**

19 Group association of the CAZyme subfamilies based on similarities in their abundance patterns.

1 **Table S11.**

2 Pearson's Correlation Coefficients for each group against different nutritional indices. Score1  
3 represents Height-for-Age; Score2 represents Weight-for-age; Score3 represents Weight-for-  
4 height and, overall represents the overall nutritional index, taking into account the previous 3  
5 indexes. The boxes marked in green and red indicate significant correlation coefficients with P-  
6 value  $< 0.05$  and  $P < 0.01$  respectively.

**Table S1.**

|                                    |                                                                                                             |
|------------------------------------|-------------------------------------------------------------------------------------------------------------|
| Z-score1 (height, H for age, A)    | $-3 + [\text{Height} - (-3\text{SD Value}_{H/A})] / [(-2\text{SD Value}_{H/A}) - (3\text{SD Value}_{H/A})]$ |
| Z-score2 (weight, W for age, A)    | $-3 + [\text{Weight} - (-3\text{SD Value}_{W/A})] / [(-2\text{SD Value}_{W/A}) - (3\text{SD Value}_{W/A})]$ |
| Z-score3 (weight, W for height, H) | $-3 + [\text{Weight} - (-3\text{SD Value}_{W/H})] / [(-2\text{SD Value}_{W/H}) - (3\text{SD Value}_{W/H})]$ |

**Table S2C.**

| Sample Name | Sample Details  |                 |                 |           | Nutritional Indices (Z-Scores) |                           |                              |                    | Metagenome Details |                                            |                                 |
|-------------|-----------------|-----------------|-----------------|-----------|--------------------------------|---------------------------|------------------------------|--------------------|--------------------|--------------------------------------------|---------------------------------|
|             | Age (in months) | Height (in cms) | Weight (in kgs) | Sex (M/F) | Z-score1 (Height for age)      | Z-score2 (Weight for age) | Z-score3 (Weight for height) | Cumulative Z-score | No. of sequences   | Average sequence length in base pairs (bp) | Metagenome Volume (in mega bps) |
| SAK7        | 60              | 90              | 9.4             | F         | -4.16                          | -4.32                     | -3.10                        | -11.58             | 1532351            | 389                                        | 596.1                           |
| SK5         | 48              | 82              | 8               | F         | -3.87                          | -4.12                     | -3.02                        | -11.01             | 1197527            | 421.7                                      | 505.0                           |
| 882RK       | 60              | 92.6            | 9.8             | F         | -3.57                          | -4.11                     | -3.09                        | -10.77             | 964526             | 405.8                                      | 391.4                           |
| LB1         | 60              | 95              | 10              | F         | -3.02                          | -4                        | -3.33                        | -10.35             | 1423176            | 323.6                                      | 460.5                           |
| 976AB       | 35              | 83.1            | 8.4             | M         | -2.95                          | -3.81                     | -3.1                         | -9.86              | 1376970            | 410.1                                      | 564.7                           |
| A1          | 48              | 90              | 10.9            | M         | -3.05                          | -3.05                     | -3.12                        | -9.22              | 1357415            | 321.8                                      | 436.8                           |
| 1660SH      | 38              | 83.3            | 9.5             | M         | -3.36                          | -3.29                     | -2.1                         | -8.75              | 1294949            | 411.8                                      | 533.3                           |
| SH3         | 60              | 99              | 11              | F         | -2.11                          | -3.47                     | -3.08                        | -8.66              | 1321688            | 365.5                                      | 483.1                           |
| 882AK       | 41              | 89.2            | 9.4             | F         | -2.10                          | -3.5                      | -2.92                        | -8.52              | 1780975            | 430.6                                      | 766.9                           |
| 683RD       | 36              | 90              | 9.5             | M         | -1.29                          | -3.19                     | -3.27                        | -7.75              | 1339040            | 418.1                                      | 559.9                           |
| DB2         | 40              | 83              | 10.2            | F         | -3.54                          | -2.93                     | -1.1                         | -7.57              | 1529727            | 356.2                                      | 544.9                           |
| IS8         | 33              | 73.3            | 10              | M         | -5.27                          | -2.73                     | 0.63                         | -7.37              | 1442484            | 373.4                                      | 538.6                           |
| 199SUBD     | 30              | 87.3            | 8.9             | F         | -0.63                          | -3.08                     | -3.18                        | -6.90              | 1121174            | 421.6                                      | 472.7                           |
| U2          | 5               | 61.2            | 5               | M         | -2.37                          | -2.3                      | -1.33                        | -6.00              | 1869990            | 423.2                                      | 791.4                           |
| SOH4        | 36              | 90              | 11              | M         | -1.29                          | -2.25                     | -1.91                        | -5.45              | 1590763            | 304.9                                      | 485.0                           |
| 976DB       | 19              | 76.9            | 8.5             | F         | -1.61                          | -2.09                     | 1.6                          | -5.31              | 1211432            | 373.3                                      | 452.2                           |
| 1660SK      | 57              | 98              | 14              | F         | -2.02                          | -1.74                     | -0.62                        | -4.38              | 1394515            | 384.4                                      | 536.1                           |
| 683PD       | 48              | 98.8            | 14              | M         | -0.95                          | -1.42                     | -1.14                        | -3.51              | 1101390            | 392.4                                      | 432.2                           |
| AA6         | 33              | 89              | 12.5            | M         | -1.03                          | -1.07                     | -0.36                        | -2.46              | 1426324            | 422.4                                      | 602.5                           |
| 199SD       | 48              | 101.3           | 12              | F         | 2                              | -1.47                     | -2.71                        | -2.18              | 1858721            | 387.2                                      | 719.7                           |



Table S2B.

**Characteristics of Participants**

|                                                             | Mean (SD)         | N (%/Absolute No.)             |
|-------------------------------------------------------------|-------------------|--------------------------------|
| <b>Gender</b>                                               |                   |                                |
| Male                                                        |                   | 9 (45%)                        |
| Female                                                      |                   | 11 (55%)                       |
| Age Mean, Months (SD)                                       | 40.65 (15.06923)  |                                |
| No. of family members Mean (SD)                             | 6.20 (1.90843)    |                                |
| Years of schooling Mean (SD)                                | 2.80 (3.237983)   |                                |
| Total annual income Median, Rs. (IQR)                       | 31740 (8124.853)  | Median - Rs.36000 ( IQR -6000) |
| <b>Assets owned by family</b>                               |                   |                                |
| House                                                       | 0.90 (0.3077935)  | 18 (90%)                       |
| Television                                                  | 0.25 (0.4442617)  | 6 (30%)                        |
| Cooler                                                      |                   | 0                              |
| Two wheeler                                                 |                   | 0                              |
| <b>Source of drinking water</b>                             |                   |                                |
| Govt. piped supply                                          |                   | 0                              |
| Govt. hand pump                                             | 0.90 (0.3077935)  | 18 (90%)                       |
| Family owned hand pump                                      |                   | 0                              |
| Water tanker                                                |                   | 0                              |
| Surface water                                               | 0.10 (0.3077935)  | 2 (10%)                        |
| Tube well                                                   |                   | 0                              |
| <b>Place of defecation</b>                                  |                   |                                |
| Pvt. toilet                                                 |                   | 0                              |
| Public toilet                                               |                   | 0                              |
| Open field                                                  | 1                 | 20 (100%)                      |
| <b>Animal exposure</b>                                      |                   |                                |
| Cattle (Cows & Buffalo)                                     | 1.20 (1.321881)   | 10 (50%)                       |
| Others                                                      | 2.45 (1.877148)   | 14 (70%)                       |
| <b>Consumption of foods (per child monthly consumption)</b> |                   |                                |
| <i>Cereals</i>                                              |                   |                                |
| Wheat                                                       | 0.30 (0.236198)   | 0.3 kg                         |
| Rice                                                        | 2.10 (0.591163)   | 2.6 kg                         |
| Other cereals                                               |                   |                                |
| <i>Pulses and legumes</i>                                   |                   |                                |
| Dal                                                         | 0.34 (0.1231174)  | 0.34 kg                        |
| Whole pulses                                                |                   |                                |
| Dairy products                                              | 300 (253.398)     | 300 ML                         |
| Fish                                                        | 0.35 (0.2685242)  | 0.350 kg                       |
| Chicken                                                     | 0.125 (0.0888523) | 0.125 kg                       |
| Goat Meat                                                   | 10 (30.77935)     | 10 gm                          |
| Egg                                                         | 5.40 (4.357691)   | 5.4 (number)                   |
| Banana                                                      | 2.30 (3.628832)   | 2.3 (number)                   |
| Coconut                                                     | 0.15 (0.3284733)  | 0.153 (number)                 |
| Guava                                                       | 0.75 (1.743409)   | 0.76 (number)                  |
| <i>Vegetables</i>                                           |                   |                                |
| Potato                                                      | 1.40 (0.5758289)  | 1.4 kg                         |
| Green Leafy                                                 | 0.18 (0.081757)   | 0.18 kg                        |
| Other Vegetables                                            | 1.60 (0.5026247)  | 1.6 kg                         |

**Table S3.**

| Metagenome | Percentage of sequences assigned at different taxonomic levels |                |                 |
|------------|----------------------------------------------------------------|----------------|-----------------|
|            | Species                                                        | Genus or below | Phylum or below |
| SAK7       | 1.4                                                            | 31.2           | 86.6            |
| SK5        | 3.9                                                            | 35.8           | 73.8            |
| 882RK      | 11                                                             | 50.7           | 77.3            |
| LB1        | 2.4                                                            | 37.6           | 75              |
| 976AB      | 6.2                                                            | 48.4           | 78.6            |
| A1         | 1.4                                                            | 43.2           | 67.8            |
| 1660SH     | 7.3                                                            | 43             | 75.5            |
| SH3        | 1.8                                                            | 37.9           | 74.1            |
| 882AK      | 6                                                              | 42.6           | 75.5            |
| 683RD      | 2.9                                                            | 29.8           | 69.3            |
| DB2        | 2.5                                                            | 34.7           | 72.4            |
| IS8        | 3.6                                                            | 34.6           | 72.1            |
| 199SUBD    | 2                                                              | 21.8           | 61.8            |
| U2         | 2.7                                                            | 38.4           | 70.4            |
| SOH4       | 4.7                                                            | 31.9           | 70.9            |
| 976DB      | 4.1                                                            | 30.5           | 67.9            |
| 1660SK     | 1.7                                                            | 22.6           | 63.2            |
| 683PD      | 12.4                                                           | 49.1           | 77              |
| 199SD      | 5.1                                                            | 36.1           | 72.1            |

**Table S4.**

(A)

| GENUS                 | SAK7  | SK5   | 882RK | LB1   | 976AB | A1    | 1660SH | SH3   | 882AK | 683RD | DB2   | IS8   | 199SUBD | U2    | SOH4  | 976DB | 1660SK | 683PD | AA6   | 199SD |
|-----------------------|-------|-------|-------|-------|-------|-------|--------|-------|-------|-------|-------|-------|---------|-------|-------|-------|--------|-------|-------|-------|
| Dorea                 | 0.11  | 0.09  | 0.18  | 0.11  | 0.21  | 0.00  | 0.15   | 0.09  | 0.21  | 0.10  | 0.15  | 0.16  | 0.11    | 0.16  | 0.07  | 0.08  | 0.47   | 0.11  | 0.15  | 0.06  |
| Leuconostoc           | 0.00  | 0.00  | 0.12  | 0.00  | 0.02  | 0.03  | 0.00   | 0.00  | 0.00  | 0.00  | 0.00  | 0.01  | 0.00    | 0.01  | 0.00  | 0.00  | 0.01   | 0.01  | 0.00  | 0.00  |
| Dialister             | 0.04  | 0.11  | 0.03  | 0.07  | 0.08  | 0.00  | 0.09   | 0.01  | 0.10  | 0.22  | 0.04  | 0.13  | 0.11    | 0.03  | 0.12  | 0.00  | 0.16   | 0.00  | 0.18  | 0.05  |
| Succinatimonas        | 0.00  | 0.08  | 0.00  | 0.01  | 0.02  | 0.00  | 0.00   | 0.02  | 0.03  | 0.16  | 0.00  | 0.03  | 0.02    | 0.00  | 0.02  | 0.32  | 0.12   | 0.00  | 0.12  | 0.00  |
| Collinsella           | 0.04  | 0.08  | 0.07  | 0.12  | 0.52  | 0.00  | 0.05   | 0.01  | 0.07  | 0.13  | 0.11  | 0.05  | 0.15    | 0.22  | 0.06  | 0.17  | 0.11   | 0.06  | 0.06  | 0.02  |
| Phascolarctobacterium | 0.00  | 0.02  | 0.05  | 0.13  | 0.05  | 0.00  | 0.04   | 0.41  | 0.00  | 0.01  | 0.00  | 0.01  | 0.28    | 0.29  | 0.01  | 0.72  | 0.31   | 0.00  | 0.21  | 0.34  |
| Veillonella           | 0.04  | 1.07  | 1.75  | 0.13  | 0.07  | 6.13  | 0.09   | 0.48  | 0.30  | 0.01  | 0.95  | 0.35  | 0.04    | 0.04  | 0.08  | 0.02  | 0.11   | 0.25  | 0.01  | 0.02  |
| Roseburia             | 0.13  | 0.27  | 0.10  | 0.32  | 0.14  | 0.00  | 0.25   | 0.72  | 0.22  | 0.12  | 0.10  | 0.71  | 0.26    | 0.50  | 0.35  | 0.22  | 1.06   | 1.72  | 1.04  | 0.13  |
| Catenibacterium       | 0.11  | 0.08  | 1.77  | 0.04  | 1.81  | 0.00  | 0.15   | 0.04  | 0.12  | 0.34  | 0.04  | 0.34  | 0.02    | 0.00  | 0.09  | 0.10  | 0.35   | 0.07  | 0.12  | 0.07  |
| Prevotella            | 24.88 | 27.81 | 13.49 | 29.18 | 22.21 | 0.08  | 35.65  | 26.53 | 25.69 | 23.08 | 26.02 | 23.51 | 13.03   | 28.76 | 24.84 | 23.67 | 10.51  | 34.75 | 13.67 | 30.01 |
| Faecalibacterium      | 0.65  | 0.87  | 0.49  | 0.88  | 0.97  | 0.00  | 0.58   | 0.95  | 0.89  | 1.56  | 0.79  | 1.22  | 1.19    | 0.46  | 0.78  | 0.50  | 1.82   | 2.20  | 1.36  | 1.38  |
| Streptococcus         | 0.24  | 0.75  | 5.13  | 1.72  | 11.26 | 0.29  | 0.11   | 0.35  | 1.78  | 0.02  | 0.50  | 0.33  | 0.03    | 0.06  | 0.14  | 0.08  | 0.15   | 0.18  | 0.04  | 0.16  |
| Shigella              | 0.02  | 0.04  | 0.11  | 0.03  | 0.02  | 1.02  | 0.01   | 0.09  | 0.22  | 0.00  | 0.05  | 0.02  | 0.00    | 0.00  | 0.02  | 0.00  | 0.00   | 0.00  | 0.12  | 0.00  |
| Escherichia           | 0.71  | 1.27  | 5.51  | 1.19  | 0.56  | 26.55 | 0.21   | 4.79  | 8.40  | 0.15  | 1.49  | 0.75  | 0.08    | 0.13  | 0.06  | 0.01  | 0.03   | 0.11  | 2.57  | 0.03  |
| Coprococcus           | 0.05  | 0.09  | 0.10  | 0.17  | 0.07  | 0.00  | 0.07   | 0.06  | 0.14  | 0.17  | 0.08  | 0.14  | 0.28    | 0.17  | 0.11  | 0.16  | 0.39   | 0.07  | 0.14  | 0.05  |
| Butyrivibrio          | 0.01  | 0.02  | 0.01  | 0.03  | 0.03  | 0.00  | 0.02   | 0.06  | 0.01  | 0.01  | 0.01  | 0.72  | 0.08    | 0.03  | 0.02  | 0.02  | 1.39   | 0.03  | 0.12  | 0.02  |
| Eubacterium           | 0.49  | 0.44  | 0.72  | 0.91  | 0.28  | 0.01  | 2.22   | 0.81  | 0.96  | 0.30  | 0.92  | 0.59  | 1.69    | 1.44  | 0.86  | 0.73  | 3.66   | 2.57  | 1.21  | 0.30  |
| Bifidobacterium       | 0.02  | 0.04  | 0.61  | 0.00  | 3.18  | 2.63  | 0.07   | 0.00  | 0.08  | 0.59  | 0.06  | 0.05  | 0.12    | 0.01  | 0.22  | 0.40  | 0.08   | 0.33  | 0.06  | 0.00  |
| Coprobacillus         | 0.00  | 0.03  | 0.16  | 0.01  | 0.05  | 1.38  | 0.00   | 0.01  | 0.00  | 0.01  | 0.01  | 0.01  | 0.02    | 0.01  | 0.02  | 0.04  | 0.02   | 0.00  | 0.01  | 0.01  |
| Paraprevotella        | 0.32  | 0.26  | 0.16  | 0.35  | 0.25  | 0.00  | 0.27   | 0.29  | 0.29  | 0.18  | 0.31  | 0.34  | 0.16    | 0.34  | 0.25  | 0.19  | 0.12   | 0.44  | 0.23  | 0.22  |
| Mitsuokella           | 0.16  | 0.07  | 0.03  | 0.03  | 0.02  | 0.00  | 0.33   | 0.00  | 0.03  | 0.01  | 0.00  | 0.01  | 0.24    | 0.14  | 1.14  | 0.11  | 0.25   | 0.01  | 0.05  | 0.07  |
| Enterobacter          | 0.00  | 0.99  | 0.01  | 0.01  | 0.01  | 0.01  | 0.00   | 0.01  | 0.01  | 0.00  | 0.02  | 0.14  | 0.00    | 0.01  | 0.00  | 0.00  | 0.00   | 0.00  | 0.04  | 0.00  |
| Lactobacillus         | 0.03  | 0.00  | 17.13 | 0.01  | 4.24  | 0.04  | 0.23   | 0.00  | 0.11  | 0.09  | 0.02  | 0.40  | 0.02    | 0.17  | 0.18  | 0.25  | 0.03   | 0.04  | 0.02  | 0.01  |

(B)

| FAMILY              | SAK7  | SK5   | 882RK | LB1   | 976AB | A1    | 1660SH | SH3   | 882AK | 683RD | DB2   | IS8   | 199SUBD | U2    | SOH4  | 976DB | 1660SK | 683PD | AA6   | 199SD |
|---------------------|-------|-------|-------|-------|-------|-------|--------|-------|-------|-------|-------|-------|---------|-------|-------|-------|--------|-------|-------|-------|
| Veillonellaceae     | 0.26  | 1.27  | 1.83  | 0.24  | 0.18  | 6.14  | 0.54   | 0.50  | 0.45  | 0.25  | 1.00  | 0.50  | 0.41    | 0.22  | 1.48  | 0.19  | 0.55   | 0.29  | 0.26  | 0.14  |
| Porphyromonadaceae  | 0.19  | 0.28  | 0.12  | 0.29  | 0.23  | 0.01  | 0.29   | 0.31  | 0.31  | 0.53  | 0.34  | 0.22  | 0.25    | 0.40  | 0.31  | 0.24  | 0.19   | 0.39  | 0.26  | 0.27  |
| Desulfovibrionaceae | 0.03  | 0.01  | 0.01  | 0.01  | 0.00  | 0.06  | 0.01   | 0.03  | 0.00  | 0.07  | 0.01  | 0.01  | 0.05    | 0.00  | 0.05  | 0.02  | 0.07   | 0.04  | 0.25  | 0.00  |
| Bacteroidaceae      | 2.44  | 2.20  | 0.60  | 2.26  | 1.32  | 0.08  | 2.21   | 2.36  | 1.47  | 2.41  | 2.91  | 1.85  | 1.35    | 4.28  | 2.23  | 1.55  | 1.08   | 5.22  | 1.91  | 1.98  |
| Lactobacillaceae    | 0.03  | 0.00  | 17.13 | 0.01  | 4.24  | 0.04  | 0.23   | 0.00  | 0.11  | 0.09  | 0.02  | 0.40  | 0.02    | 0.17  | 0.18  | 0.25  | 0.03   | 0.04  | 0.02  | 0.01  |
| Streptococcaceae    | 0.24  | 0.75  | 5.13  | 1.72  | 11.28 | 0.29  | 0.11   | 0.35  | 1.79  | 0.02  | 0.50  | 0.33  | 0.03    | 0.09  | 0.14  | 0.08  | 0.15   | 0.19  | 0.04  | 0.16  |
| Enterobacteriaceae  | 0.76  | 3.17  | 5.70  | 1.40  | 0.66  | 28.02 | 0.25   | 4.94  | 8.80  | 0.19  | 1.95  | 1.10  | 0.10    | 0.16  | 0.12  | 0.03  | 0.07   | 0.13  | 2.82  | 0.04  |
| Bifidobacteriaceae  | 0.02  | 0.04  | 0.61  | 0.00  | 3.18  | 2.63  | 0.07   | 0.00  | 0.08  | 0.59  | 0.06  | 0.05  | 0.12    | 0.01  | 0.22  | 0.40  | 0.08   | 0.33  | 0.06  | 0.00  |
| Coriobacteriaceae   | 0.05  | 0.09  | 0.09  | 0.13  | 0.54  | 0.20  | 0.05   | 0.02  | 0.08  | 0.14  | 0.12  | 0.06  | 0.18    | 0.23  | 0.07  | 0.19  | 0.14   | 0.07  | 0.08  | 0.02  |
| Lachnospiraceae     | 0.34  | 0.52  | 0.48  | 0.69  | 0.64  | 0.02  | 0.54   | 0.96  | 0.64  | 0.46  | 0.37  | 1.84  | 0.84    | 0.93  | 0.61  | 0.51  | 3.49   | 2.14  | 1.58  | 0.30  |
| Pasteurellaceae     | 0.07  | 0.15  | 0.37  | 0.01  | 0.20  | 0.01  | 0.07   | 0.09  | 0.01  | 0.06  | 0.08  | 0.10  | 0.05    | 0.07  | 0.04  | 0.04  | 0.09   | 0.06  | 0.02  | 0.13  |
| Prevotellaceae      | 25.21 | 28.06 | 13.64 | 29.53 | 22.46 | 0.08  | 35.92  | 26.82 | 25.98 | 23.26 | 26.33 | 23.85 | 13.19   | 29.10 | 25.09 | 23.86 | 10.63  | 35.19 | 13.90 | 30.24 |
| Clostridiaceae      | 0.07  | 0.15  | 2.42  | 0.15  | 0.26  | 0.04  | 0.17   | 0.17  | 0.16  | 0.19  | 0.14  | 0.31  | 0.52    | 0.13  | 0.20  | 0.13  | 0.77   | 0.28  | 0.39  | 0.14  |
| Succinivibrionaceae | 0.00  | 0.08  | 0.00  | 0.01  | 0.02  | 0.00  | 0.00   | 0.02  | 0.03  | 0.16  | 0.00  | 0.03  | 0.02    | 0.00  | 0.02  | 0.32  | 0.12   | 0.00  | 0.12  | 0.00  |
| Acidaminococcaceae  | 0.03  | 0.05  | 0.07  | 0.17  | 0.07  | 0.12  | 0.06   | 0.43  | 0.22  | 0.03  | 0.02  | 0.06  | 0.30    | 0.31  | 0.06  | 0.74  | 0.34   | 0.01  | 0.25  | 0.35  |
| Rikenellaceae       | 0.01  | 0.02  | 0.01  | 0.03  | 0.02  | 0.10  | 0.02   | 0.01  | 0.01  | 0.03  | 0.03  | 0.07  | 0.03    | 0.01  | 0.10  | 0.05  | 0.03   | 0.01  | 0.11  | 0.01  |
| Erysipelotrichaceae | 0.22  | 0.20  | 2.01  | 0.18  | 2.05  | 1.38  | 0.20   | 0.10  | 0.19  | 0.70  | 0.13  | 0.64  | 0.23    | 0.30  | 0.20  | 0.32  | 0.59   | 0.16  | 0.25  | 0.21  |
| Eubacteriaceae      | 0.49  | 0.44  | 0.72  | 0.91  | 0.28  | 0.02  | 2.22   | 0.81  | 0.96  | 0.30  | 0.92  | 0.60  | 1.70    | 1.44  | 0.86  | 0.73  | 3.67   | 2.57  | 1.21  | 0.30  |
| Ruminococcaceae     | 0.73  | 1.07  | 0.78  | 1.08  | 1.38  | 0.00  | 0.80   | 1.12  | 1.16  | 1.71  | 0.88  | 1.90  | 1.74    | 0.71  | 0.94  | 0.69  | 2.65   | 2.76  | 1.70  | 1.56  |
| Sutterellaceae      | 0.12  | 0.03  | 0.06  | 0.01  | 0.01  | 0.00  | 0.12   | 0.01  | 0.01  | 0.03  | 0.04  | 0.01  | 0.00    | 0.02  | 0.02  | 0.05  | 0.02   | 0.00  | 0.03  | 0.00  |
| Leuconostocaceae    | 0.00  | 0.01  | 0.24  | 0.00  | 0.03  | 0.03  | 0.00   | 0.00  | 0.00  | 0.00  | 0.00  | 0.02  | 0.00    | 0.01  | 0.01  | 0.00  | 0.01   | 0.01  | 0.00  | 0.00  |

(C)

| ORDER              | SAK7  | SK5   | 882RK | LB1   | 976AB | A1    | 1660SH | SH3   | 882AK | 683RD | DB2   | IS8   | 199SUBD | U2    | SOH4  | 976DB | 1660SK | 683PD | AA6   | 199SD |
|--------------------|-------|-------|-------|-------|-------|-------|--------|-------|-------|-------|-------|-------|---------|-------|-------|-------|--------|-------|-------|-------|
| Aeromonadales      | 0.00  | 0.08  | 0.00  | 0.01  | 0.02  | 0.00  | 0.00   | 0.02  | 0.04  | 0.16  | 0.00  | 0.03  | 0.02    | 0.00  | 0.02  | 0.33  | 0.12   | 0.00  | 0.12  | 0.00  |
| Erysipelotrichales | 0.22  | 0.20  | 2.01  | 0.18  | 2.05  | 1.38  | 0.20   | 0.10  | 0.19  | 0.70  | 0.13  | 0.64  | 0.23    | 0.30  | 0.20  | 0.32  | 0.59   | 0.16  | 0.25  | 0.21  |
| Desulfovibrionales | 0.03  | 0.01  | 0.01  | 0.01  | 0.00  | 0.06  | 0.01   | 0.03  | 0.00  | 0.07  | 0.01  | 0.01  | 0.05    | 0.00  | 0.05  | 0.02  | 0.07   | 0.04  | 0.25  | 0.00  |
| Pasteurellales     | 0.07  | 0.15  | 0.37  | 0.01  | 0.20  | 0.01  | 0.07   | 0.09  | 0.01  | 0.06  | 0.08  | 0.10  | 0.05    | 0.07  | 0.04  | 0.04  | 0.09   | 0.06  | 0.02  | 0.13  |
| Selenomonadales    | 0.29  | 1.31  | 1.90  | 0.41  | 0.24  | 6.26  | 0.59   | 0.93  | 0.68  | 0.28  | 1.01  | 0.57  | 0.71    | 0.53  | 1.54  | 0.93  | 0.89   | 0.30  | 0.51  | 0.49  |
| Lactobacillales    | 0.27  | 0.79  | 22.57 | 1.76  | 15.59 | 0.82  | 0.35   | 0.37  | 1.97  | 0.11  | 0.53  | 0.76  | 0.06    | 0.28  | 0.33  | 0.34  | 0.21   | 0.24  | 0.07  | 0.17  |
| Enterobacteriales  | 0.76  | 3.17  | 5.70  | 1.40  | 0.66  | 28.02 | 0.25   | 4.94  | 8.80  | 0.19  | 1.95  | 1.10  | 0.10    | 0.16  | 0.12  | 0.03  | 0.07   | 0.13  | 2.82  | 0.04  |
| Bifidobacteriales  | 0.02  | 0.04  | 0.61  | 0.00  | 3.18  | 2.63  | 0.07   | 0.00  | 0.08  | 0.59  | 0.06  | 0.05  | 0.12    | 0.01  | 0.22  | 0.40  | 0.08   | 0.33  | 0.06  | 0.00  |
| Clostridiales      | 1.66  | 2.24  | 4.51  | 2.88  | 2.75  | 0.15  | 3.76   | 3.11  | 2.96  | 2.73  | 2.38  | 4.78  | 5.16    | 3.24  | 2.82  | 2.11  | 10.85  | 7.82  | 5.09  | 2.33  |
| Spirochaetales     | 0.00  | 0.00  | 0.01  | 0.00  | 1.09  | 0.02  | 0.00   | 0.00  | 0.00  | 0.08  | 0.00  | 0.57  | 0.16    | 0.00  | 0.00  | 0.00  | 0.25   | 0.00  | 0.00  | 0.15  |
| Coriobacteriales   | 0.05  | 0.09  | 0.09  | 0.13  | 0.54  | 0.20  | 0.05   | 0.02  | 0.08  | 0.14  | 0.12  | 0.06  | 0.18    | 0.23  | 0.07  | 0.19  | 0.14   | 0.07  | 0.08  | 0.02  |
| Bacteroidales      | 27.84 | 30.57 | 14.37 | 32.12 | 24.02 | 0.27  | 38.44  | 29.50 | 27.77 | 26.23 | 29.63 | 26.00 | 14.82   | 33.78 | 27.73 | 25.70 | 11.92  | 40.82 | 16.19 | 32.50 |
| Burkholderiales    | 0.12  | 0.04  | 0.07  | 0.03  | 0.01  | 0.02  | 0.13   | 0.02  | 0.01  | 0.04  | 0.05  | 0.03  | 0.03    | 0.02  | 0.04  | 0.06  | 0.04   | 0.00  | 0.05  | 0.01  |

(D)

| CLASS                  | SAK7  | SK5   | 882RK | LB1   | 976AB | A1    | 1660SH | SH3   | 882AK | 683RD | DB2   | IS8   | 199SUBD | U2    | SOH4  | 976DB | 1660SK | 683PD | AA6   | 199SD |
|------------------------|-------|-------|-------|-------|-------|-------|--------|-------|-------|-------|-------|-------|---------|-------|-------|-------|--------|-------|-------|-------|
| Alphaproteobacteria    | 0.00  | 0.01  | 0.01  | 0.02  | 0.01  | 0.02  | 0.01   | 0.01  | 0.01  | 0.01  | 0.01  | 0.03  | 0.02    | 0.01  | 0.02  | 0.01  | 0.03   | 0.01  | 0.02  | 0.01  |
| Deltaproteobacteria    | 0.03  | 0.02  | 0.01  | 0.02  | 0.01  | 0.07  | 0.02   | 0.03  | 0.02  | 0.10  | 0.02  | 0.03  | 0.07    | 0.01  | 0.06  | 0.02  | 0.09   | 0.04  | 0.26  | 0.01  |
| Gammaproteobacteria    | 0.83  | 3.41  | 6.09  | 1.45  | 0.89  | 28.09 | 0.34   | 5.06  | 8.86  | 0.44  | 2.05  | 1.28  | 0.19    | 0.24  | 0.22  | 0.44  | 0.32   | 0.20  | 2.99  | 0.19  |
| Erysipelotrichi        | 0.22  | 0.20  | 2.01  | 0.18  | 2.05  | 1.38  | 0.20   | 0.10  | 0.19  | 0.70  | 0.13  | 0.64  | 0.23    | 0.30  | 0.20  | 0.32  | 0.59   | 0.16  | 0.25  | 0.21  |
| Spirochaetia           | 0.00  | 0.00  | 0.01  | 0.00  | 1.09  | 0.02  | 0.00   | 0.00  | 0.00  | 0.08  | 0.00  | 0.57  | 0.16    | 0.00  | 0.00  | 0.00  | 0.25   | 0.00  | 0.00  | 0.15  |
| Bacteroidia            | 27.84 | 30.57 | 14.37 | 32.12 | 24.02 | 0.27  | 38.44  | 29.50 | 27.77 | 26.23 | 29.63 | 26.00 | 14.82   | 33.78 | 27.73 | 25.70 | 11.92  | 40.82 | 16.19 | 32.50 |
| Negativicutes          | 0.29  | 1.31  | 1.90  | 0.41  | 0.24  | 6.26  | 0.59   | 0.93  | 0.68  | 0.28  | 1.01  | 0.57  | 0.71    | 0.53  | 1.54  | 0.93  | 0.89   | 0.30  | 0.51  | 0.49  |
| Clostridia             | 1.66  | 2.24  | 4.51  | 2.88  | 2.75  | 0.17  | 3.76   | 3.11  | 2.96  | 2.73  | 2.38  | 4.78  | 5.16    | 3.24  | 2.82  | 2.11  | 10.85  | 7.82  | 5.09  | 2.33  |
| Actinobacteria (class) | 0.07  | 0.15  | 0.72  | 0.15  | 3.73  | 2.88  | 0.13   | 0.04  | 0.17  | 0.75  | 0.19  | 0.13  | 0.33    | 0.24  | 0.31  | 0.59  | 0.25   | 0.41  | 0.16  | 0.03  |
| Bacilli                | 0.27  | 0.80  | 22.60 | 1.77  | 15.60 | 0.87  | 0.36   | 0.38  | 1.98  | 0.12  | 0.54  | 0.78  | 0.07    | 0.29  | 0.35  | 0.35  | 0.22   | 0.25  | 0.08  | 0.18  |
| Betaproteobacteria     | 0.13  | 0.08  | 0.08  | 0.04  | 0.04  | 0.06  | 0.13   | 0.08  | 0.01  | 0.05  | 0.08  | 0.04  | 0.04    | 0.02  | 0.05  | 0.06  | 0.06   | 0.01  | 0.07  | 0.01  |

(E)

| PHYLUM         | SAK7  | SK5   | 882RK | LB1   | 976AB | A1    | 1660SH | SH3   | 882AK | 683RD | DB2   | IS8   | 199SUBD | U2    | SOH4  | 976DB | 1660SK | 683PD | AA6   | 199SD |
|----------------|-------|-------|-------|-------|-------|-------|--------|-------|-------|-------|-------|-------|---------|-------|-------|-------|--------|-------|-------|-------|
| Bacteroidetes  | 71.73 | 56.56 | 23.22 | 60.06 | 42.33 | 1.63  | 63.93  | 56.96 | 52.41 | 52.59 | 59.09 | 48.61 | 34.80   | 59.50 | 52.53 | 48.16 | 28.56  | 61.20 | 36.82 | 59.48 |
| Fusobacteria   | 0.53  | 0.42  | 1.40  | 0.28  | 0.49  | 9.06  | 0.24   | 0.28  | 0.22  | 0.27  | 0.34  | 0.37  | 0.42    | 0.26  | 0.45  | 0.66  | 0.47   | 0.23  | 0.33  | 0.36  |
| Euryarchaeota  | 0.27  | 0.16  | 0.18  | 0.19  | 0.14  | 0.71  | 0.17   | 0.16  | 0.13  | 0.16  | 0.19  | 0.19  | 0.38    | 0.11  | 0.24  | 0.22  | 0.28   | 0.14  | 0.20  | 0.21  |
| Actinobacteria | 0.48  | 0.42  | 0.96  | 0.56  | 4.22  | 3.36  | 0.37   | 0.30  | 0.41  | 1.19  | 0.59  | 0.58  | 1.24    | 0.43  | 0.98  | 0.86  | 1.03   | 0.69  | 0.78  | 0.29  |
| Proteobacteria | 3.32  | 6.50  | 7.77  | 3.43  | 2.88  | 33.37 | 1.93   | 7.09  | 10.85 | 4.20  | 3.90  | 4.35  | 3.03    | 1.58  | 3.62  | 7.24  | 4.94   | 1.50  | 7.00  | 1.89  |
| Spirochaetes   | 0.16  | 0.08  | 0.12  | 0.10  | 2.98  | 0.36  | 0.08   | 0.10  | 0.08  | 0.25  | 0.10  | 1.16  | 1.08    | 0.09  | 0.14  | 0.17  | 0.77   | 0.10  | 0.11  | 0.91  |
| Synergistetes  | 0.02  | 0.02  | 0.01  | 0.03  | 0.01  | 0.01  | 0.01   | 0.02  | 0.02  | 0.03  | 0.02  | 0.04  | 0.13    | 0.01  | 0.04  | 0.01  | 0.08   | 0.01  | 0.08  | 0.02  |
| Firmicutes     | 8.63  | 9.86  | 43.85 | 10.59 | 25.74 | 17.65 | 8.97   | 9.37  | 10.94 | 10.74 | 8.37  | 16.23 | 19.90   | 8.10  | 13.18 | 9.77  | 27.47  | 13.24 | 18.13 | 8.30  |

**Table S5.**

(A)

| GENUS                 | SAK7 | SK5  | 882RK | LB1  | 976AB | A1   | 1660SH | SH3  | 882AK | 683RD | DB2  | IS8  | 199SUBD | U2   | SOH4 | 976DB | 1660SK | 683PD | AA6  | 199SD |
|-----------------------|------|------|-------|------|-------|------|--------|------|-------|-------|------|------|---------|------|------|-------|--------|-------|------|-------|
| Dorea                 | 0.37 | 0.26 | 0.84  | 0.47 | 0.95  | 0.00 | 0.58   | 0.21 | 0.89  | 0.32  | 0.63 | 0.79 | 0.42    | 0.74 | 0.11 | 0.16  | 1.00   | 0.53  | 0.68 | 0.05  |
| Leuconostoc           | 0.00 | 0.58 | 1.00  | 0.37 | 0.89  | 0.95 | 0.11   | 0.32 | 0.63  | 0.47  | 0.26 | 0.79 | 0.05    | 0.84 | 0.53 | 0.21  | 0.68   | 0.74  | 0.42 | 0.16  |
| Dialister             | 0.32 | 0.68 | 0.26  | 0.47 | 0.53  | 0.00 | 0.58   | 0.16 | 0.63  | 1.00  | 0.37 | 0.84 | 0.74    | 0.21 | 0.79 | 0.05  | 0.89   | 0.11  | 0.95 | 0.42  |
| Succinatimonas        | 0.11 | 0.79 | 0.26  | 0.42 | 0.58  | 0.21 | 0.16   | 0.53 | 0.74  | 0.95  | 0.32 | 0.68 | 0.63    | 0.00 | 0.47 | 1.00  | 0.89   | 0.05  | 0.84 | 0.37  |
| Collinsella           | 0.16 | 0.58 | 0.47  | 0.74 | 1.00  | 0.00 | 0.26   | 0.05 | 0.53  | 0.79  | 0.63 | 0.21 | 0.84    | 0.95 | 0.32 | 0.89  | 0.68   | 0.37  | 0.42 | 0.11  |
| Phascolarctobacterium | 0.05 | 0.42 | 0.58  | 0.63 | 0.53  | 0.00 | 0.47   | 0.95 | 0.21  | 0.26  | 0.11 | 0.32 | 0.74    | 0.79 | 0.37 | 1.00  | 0.84   | 0.16  | 0.68 | 0.89  |
| Veillonella           | 0.32 | 0.89 | 0.95  | 0.58 | 0.37  | 1.00 | 0.47   | 0.79 | 0.68  | 0.05  | 0.84 | 0.74 | 0.21    | 0.26 | 0.42 | 0.16  | 0.53   | 0.63  | 0.00 | 0.11  |
| Roseburia             | 0.21 | 0.58 | 0.11  | 0.63 | 0.32  | 0.00 | 0.47   | 0.84 | 0.42  | 0.16  | 0.05 | 0.79 | 0.53    | 0.74 | 0.68 | 0.37  | 0.95   | 1.00  | 0.89 | 0.26  |
| Catenibacterium       | 0.58 | 0.42 | 0.95  | 0.21 | 1.00  | 0.00 | 0.74   | 0.16 | 0.63  | 0.79  | 0.26 | 0.84 | 0.11    | 0.05 | 0.47 | 0.53  | 0.89   | 0.32  | 0.68 | 0.37  |
| Prevotella            | 0.53 | 0.74 | 0.16  | 0.84 | 0.26  | 0.00 | 1.00   | 0.68 | 0.58  | 0.32  | 0.63 | 0.37 | 0.11    | 0.79 | 0.47 | 0.42  | 0.05   | 0.95  | 0.21 | 0.89  |
| Faecalibacterium      | 0.26 | 0.42 | 0.11  | 0.47 | 0.63  | 0.00 | 0.21   | 0.58 | 0.53  | 0.89  | 0.37 | 0.74 | 0.68    | 0.05 | 0.32 | 0.16  | 0.95   | 1.00  | 0.79 | 0.84  |
| Streptococcus         | 0.53 | 0.79 | 0.95  | 0.84 | 1.00  | 0.58 | 0.26   | 0.68 | 0.89  | 0.00  | 0.74 | 0.63 | 0.05    | 0.16 | 0.32 | 0.21  | 0.37   | 0.47  | 0.11 | 0.42  |
| Shigella              | 0.53 | 0.68 | 0.84  | 0.63 | 0.58  | 1.00 | 0.37   | 0.79 | 0.95  | 0.21  | 0.74 | 0.47 | 0.11    | 0.26 | 0.42 | 0.05  | 0.00   | 0.16  | 0.89 | 0.32  |
| Escherichia           | 0.53 | 0.68 | 0.89  | 0.63 | 0.47  | 1.00 | 0.42   | 0.84 | 0.95  | 0.37  | 0.74 | 0.58 | 0.21    | 0.32 | 0.16 | 0.00  | 0.05   | 0.26  | 0.79 | 0.11  |
| Coprococcus           | 0.05 | 0.42 | 0.47  | 0.84 | 0.21  | 0.00 | 0.32   | 0.16 | 0.58  | 0.79  | 0.37 | 0.63 | 0.95    | 0.89 | 0.53 | 0.74  | 1.00   | 0.26  | 0.68 | 0.11  |
| Butyrivibrio          | 0.11 | 0.37 | 0.05  | 0.74 | 0.58  | 0.00 | 0.32   | 0.79 | 0.21  | 0.26  | 0.16 | 0.95 | 0.84    | 0.68 | 0.42 | 0.53  | 1.00   | 0.63  | 0.89 | 0.47  |
| Eubacterium           | 0.26 | 0.21 | 0.37  | 0.58 | 0.05  | 0.00 | 0.89   | 0.47 | 0.68  | 0.16  | 0.63 | 0.32 | 0.84    | 0.79 | 0.53 | 0.42  | 1.00   | 0.95  | 0.74 | 0.11  |
| Bifidobacterium       | 0.21 | 0.26 | 0.89  | 0.11 | 1.00  | 0.95 | 0.47   | 0.05 | 0.53  | 0.84  | 0.37 | 0.32 | 0.63    | 0.16 | 0.68 | 0.79  | 0.58   | 0.74  | 0.42 | 0.00  |
| Coprobacillus         | 0.11 | 0.79 | 0.95  | 0.21 | 0.89  | 1.00 | 0.16   | 0.53 | 0.00  | 0.32  | 0.47 | 0.58 | 0.63    | 0.42 | 0.74 | 0.84  | 0.68   | 0.05  | 0.26 | 0.37  |
| Paraprevotella        | 0.79 | 0.53 | 0.16  | 0.95 | 0.47  | 0.00 | 0.58   | 0.63 | 0.68  | 0.21  | 0.74 | 0.89 | 0.11    | 0.84 | 0.42 | 0.26  | 0.05   | 1.00  | 0.37 | 0.32  |
| Mitsuokella           | 0.79 | 0.63 | 0.42  | 0.47 | 0.32  | 0.00 | 0.95   | 0.05 | 0.37  | 0.16  | 0.11 | 0.26 | 0.84    | 0.74 | 1.00 | 0.68  | 0.89   | 0.21  | 0.53 | 0.58  |
| Enterobacter          | 0.32 | 1.00 | 0.68  | 0.63 | 0.47  | 0.74 | 0.21   | 0.53 | 0.79  | 0.26  | 0.84 | 0.95 | 0.05    | 0.58 | 0.37 | 0.11  | 0.42   | 0.16  | 0.89 | 0.00  |
| Lactobacillus         | 0.37 | 0.05 | 1.00  | 0.16 | 0.95  | 0.47 | 0.79   | 0.00 | 0.63  | 0.58  | 0.32 | 0.89 | 0.21    | 0.68 | 0.74 | 0.84  | 0.42   | 0.53  | 0.26 | 0.11  |

(B)

| FAMILY              | SAK7 | SK5  | 976AB | LB1  | 882RK | A1   | 1660SH | SH3  | 976DB | 683RD | DB2  | IS8  | 199SUBD | U2   | SOH4 | 882AK | 1660SK | 683PD | AA6  | 199SD |
|---------------------|------|------|-------|------|-------|------|--------|------|-------|-------|------|------|---------|------|------|-------|--------|-------|------|-------|
| Veillonellaceae     | 0.32 | 0.84 | 0.05  | 0.21 | 0.95  | 1.00 | 0.68   | 0.58 | 0.11  | 0.26  | 0.79 | 0.63 | 0.47    | 0.16 | 0.89 | 0.53  | 0.74   | 0.42  | 0.37 | 0.00  |
| Porphyromonadaceae  | 0.16 | 0.53 | 0.26  | 0.58 | 0.05  | 0.00 | 0.63   | 0.79 | 0.32  | 1.00  | 0.84 | 0.21 | 0.37    | 0.95 | 0.74 | 0.68  | 0.11   | 0.89  | 0.42 | 0.47  |
| Desulfovibrionaceae | 0.58 | 0.21 | 0.11  | 0.47 | 0.32  | 0.84 | 0.37   | 0.63 | 0.53  | 0.95  | 0.26 | 0.42 | 0.79    | 0.00 | 0.74 | 0.05  | 0.89   | 0.68  | 1.00 | 0.16  |
| Bacteroidaceae      | 0.84 | 0.53 | 0.16  | 0.68 | 0.05  | 0.00 | 0.58   | 0.74 | 0.32  | 0.79  | 0.89 | 0.37 | 0.21    | 0.95 | 0.63 | 0.26  | 0.11   | 1.00  | 0.42 | 0.47  |
| Lactobacillaceae    | 0.37 | 0.05 | 0.95  | 0.16 | 1.00  | 0.47 | 0.79   | 0.00 | 0.84  | 0.58  | 0.32 | 0.89 | 0.21    | 0.68 | 0.74 | 0.63  | 0.42   | 0.53  | 0.26 | 0.11  |
| Streptococcaceae    | 0.53 | 0.79 | 1.00  | 0.84 | 0.95  | 0.58 | 0.26   | 0.68 | 0.16  | 0.00  | 0.74 | 0.63 | 0.05    | 0.21 | 0.32 | 0.89  | 0.37   | 0.47  | 0.11 | 0.42  |
| Enterobacteriaceae  | 0.53 | 0.79 | 0.47  | 0.63 | 0.89  | 1.00 | 0.42   | 0.84 | 0.00  | 0.37  | 0.68 | 0.58 | 0.16    | 0.32 | 0.21 | 0.95  | 0.11   | 0.26  | 0.74 | 0.05  |
| Bifidobacteriaceae  | 0.21 | 0.26 | 1.00  | 0.11 | 0.89  | 0.95 | 0.47   | 0.00 | 0.79  | 0.84  | 0.37 | 0.32 | 0.63    | 0.16 | 0.68 | 0.53  | 0.58   | 0.74  | 0.42 | 0.05  |
| Coriobacteriaceae   | 0.11 | 0.47 | 1.00  | 0.63 | 0.53  | 0.89 | 0.16   | 0.00 | 0.84  | 0.74  | 0.58 | 0.21 | 0.79    | 0.95 | 0.26 | 0.42  | 0.68   | 0.32  | 0.37 | 0.05  |
| Lachnospiraceae     | 0.11 | 0.37 | 0.58  | 0.63 | 0.26  | 0.00 | 0.42   | 0.79 | 0.32  | 0.21  | 0.16 | 0.89 | 0.68    | 0.74 | 0.47 | 0.53  | 1.00   | 0.95  | 0.84 | 0.05  |
| Pasteurellaceae     | 0.53 | 0.89 | 0.95  | 0.11 | 1.00  | 0.00 | 0.58   | 0.68 | 0.26  | 0.37  | 0.63 | 0.79 | 0.32    | 0.47 | 0.21 | 0.05  | 0.74   | 0.42  | 0.16 | 0.84  |
| Prevotellaceae      | 0.53 | 0.74 | 0.26  | 0.84 | 0.16  | 0.00 | 1.00   | 0.68 | 0.42  | 0.32  | 0.63 | 0.37 | 0.11    | 0.79 | 0.47 | 0.58  | 0.05   | 0.95  | 0.21 | 0.89  |
| Clostridiaceae      | 0.05 | 0.32 | 0.68  | 0.37 | 1.00  | 0.00 | 0.53   | 0.47 | 0.16  | 0.58  | 0.26 | 0.79 | 0.89    | 0.11 | 0.63 | 0.42  | 0.95   | 0.74  | 0.84 | 0.21  |
| Succinivibrionaceae | 0.11 | 0.79 | 0.58  | 0.42 | 0.26  | 0.21 | 0.16   | 0.53 | 1.00  | 0.95  | 0.32 | 0.68 | 0.63    | 0.05 | 0.47 | 0.74  | 0.89   | 0.00  | 0.84 | 0.37  |
| Acidaminococcaceae  | 0.16 | 0.21 | 0.42  | 0.58 | 0.47  | 0.53 | 0.26   | 0.95 | 1.00  | 0.11  | 0.05 | 0.37 | 0.74    | 0.79 | 0.32 | 0.63  | 0.84   | 0.00  | 0.68 | 0.89  |
| Rikenellaceae       | 0.00 | 0.42 | 0.37  | 0.63 | 0.32  | 0.89 | 0.47   | 0.05 | 0.79  | 0.58  | 0.74 | 0.84 | 0.68    | 0.21 | 0.95 | 0.26  | 0.53   | 0.16  | 1.00 | 0.11  |
| Erysipelotrichaceae | 0.47 | 0.32 | 1.00  | 0.16 | 0.95  | 0.89 | 0.37   | 0.00 | 0.68  | 0.84  | 0.05 | 0.79 | 0.53    | 0.63 | 0.26 | 0.21  | 0.74   | 0.11  | 0.58 | 0.42  |
| Eubacteriaceae      | 0.26 | 0.21 | 0.05  | 0.58 | 0.37  | 0.00 | 0.89   | 0.47 | 0.42  | 0.16  | 0.63 | 0.32 | 0.84    | 0.79 | 0.53 | 0.68  | 1.00   | 0.95  | 0.74 | 0.11  |
| Ruminococcaceae     | 0.16 | 0.42 | 0.63  | 0.47 | 0.21  | 0.00 | 0.26   | 0.53 | 0.05  | 0.79  | 0.32 | 0.89 | 0.84    | 0.11 | 0.37 | 0.58  | 0.95   | 1.00  | 0.74 | 0.68  |
| Sutterellaceae      | 1.00 | 0.63 | 0.26  | 0.37 | 0.89  | 0.05 | 0.95   | 0.42 | 0.84  | 0.74  | 0.79 | 0.32 | 0.11    | 0.47 | 0.58 | 0.21  | 0.53   | 0.00  | 0.68 | 0.16  |
| Leuconostocaceae    | 0.00 | 0.68 | 1.00  | 0.37 | 0.89  | 0.95 | 0.11   | 0.26 | 0.53  | 0.47  | 0.32 | 0.84 | 0.05    | 0.79 | 0.58 | 0.16  | 0.63   | 0.74  | 0.42 | 0.21  |



(C)

| ORDER              | SAK7 | SK5  | 882RK | LB1  | 976AB | A1   | 1660SH | SH3  | 882AK | 683RD | DB2  | IS8  | 199SUBD | U2   | SOH4 | 976DB | 1660SK | 683PD | AA6  | 199SD |
|--------------------|------|------|-------|------|-------|------|--------|------|-------|-------|------|------|---------|------|------|-------|--------|-------|------|-------|
| Aeromonadales      | 0.00 | 0.79 | 0.21  | 0.42 | 0.58  | 0.26 | 0.11   | 0.53 | 0.74  | 0.95  | 0.32 | 0.68 | 0.63    | 0.05 | 0.47 | 1.00  | 0.89   | 0.16  | 0.84 | 0.37  |
| Erysipelotrichales | 0.47 | 0.32 | 0.95  | 0.16 | 1.00  | 0.89 | 0.37   | 0.00 | 0.21  | 0.84  | 0.05 | 0.79 | 0.53    | 0.63 | 0.26 | 0.68  | 0.74   | 0.11  | 0.58 | 0.42  |
| Desulfovibrionales | 0.58 | 0.21 | 0.32  | 0.47 | 0.16  | 0.84 | 0.37   | 0.63 | 0.05  | 0.95  | 0.26 | 0.42 | 0.79    | 0.00 | 0.74 | 0.53  | 0.89   | 0.68  | 1.00 | 0.11  |
| Pasteurellales     | 0.53 | 0.89 | 1.00  | 0.11 | 0.95  | 0.00 | 0.58   | 0.68 | 0.05  | 0.37  | 0.63 | 0.79 | 0.32    | 0.47 | 0.21 | 0.26  | 0.74   | 0.42  | 0.16 | 0.84  |
| Selenomonadales    | 0.11 | 0.84 | 0.95  | 0.21 | 0.00  | 1.00 | 0.47   | 0.74 | 0.53  | 0.05  | 0.79 | 0.42 | 0.58    | 0.37 | 0.89 | 0.68  | 0.63   | 0.16  | 0.32 | 0.26  |
| Lactobacillales    | 0.32 | 0.74 | 1.00  | 0.84 | 0.95  | 0.79 | 0.53   | 0.58 | 0.89  | 0.11  | 0.63 | 0.68 | 0.00    | 0.37 | 0.42 | 0.47  | 0.21   | 0.26  | 0.05 | 0.16  |
| Enterobacteriales  | 0.53 | 0.79 | 0.89  | 0.63 | 0.47  | 1.00 | 0.42   | 0.84 | 0.95  | 0.37  | 0.68 | 0.58 | 0.16    | 0.32 | 0.21 | 0.00  | 0.11   | 0.26  | 0.74 | 0.05  |
| Bifidobacteriales  | 0.21 | 0.26 | 0.89  | 0.11 | 1.00  | 0.95 | 0.47   | 0.05 | 0.53  | 0.84  | 0.37 | 0.32 | 0.63    | 0.16 | 0.68 | 0.79  | 0.58   | 0.74  | 0.42 | 0.00  |
| Clostridiales      | 0.05 | 0.16 | 0.74  | 0.47 | 0.37  | 0.00 | 0.68   | 0.58 | 0.53  | 0.32  | 0.26 | 0.79 | 0.89    | 0.63 | 0.42 | 0.11  | 1.00   | 0.95  | 0.84 | 0.21  |
| Spirochaetales     | 0.00 | 0.32 | 0.63  | 0.58 | 1.00  | 0.68 | 0.05   | 0.21 | 0.26  | 0.74  | 0.47 | 0.95 | 0.84    | 0.16 | 0.53 | 0.42  | 0.89   | 0.11  | 0.37 | 0.79  |
| Coriobacteriales   | 0.11 | 0.47 | 0.53  | 0.63 | 1.00  | 0.89 | 0.16   | 0.00 | 0.42  | 0.74  | 0.58 | 0.21 | 0.79    | 0.95 | 0.26 | 0.84  | 0.68   | 0.32  | 0.37 | 0.05  |
| Bacteroidales      | 0.58 | 0.74 | 0.11  | 0.79 | 0.26  | 0.00 | 0.95   | 0.63 | 0.53  | 0.42  | 0.68 | 0.37 | 0.16    | 0.89 | 0.47 | 0.32  | 0.05   | 1.00  | 0.21 | 0.84  |
| Burkholderiales    | 0.95 | 0.68 | 0.89  | 0.42 | 0.16  | 0.21 | 1.00   | 0.32 | 0.11  | 0.58  | 0.74 | 0.37 | 0.47    | 0.26 | 0.63 | 0.84  | 0.53   | 0.00  | 0.79 | 0.05  |

(D)

| CLASS                  | SAK7 | SK5  | 882RK | LB1  | 976AB | A1   | 1660SH | SH3  | 882AK | 683RD | DB2  | IS8  | 199SUBD | U2   | SOH4 | 976DB | 1660SK | 683PD | AA6  | 199SD |
|------------------------|------|------|-------|------|-------|------|--------|------|-------|-------|------|------|---------|------|------|-------|--------|-------|------|-------|
| Alphaproteobacteria    | 0.00 | 0.47 | 0.11  | 0.68 | 0.32  | 0.79 | 0.37   | 0.58 | 0.21  | 0.53  | 0.63 | 1.00 | 0.89    | 0.05 | 0.84 | 0.26  | 0.95   | 0.16  | 0.74 | 0.42  |
| Deltaproteobacteria    | 0.53 | 0.26 | 0.16  | 0.47 | 0.11  | 0.84 | 0.37   | 0.63 | 0.32  | 0.95  | 0.21 | 0.58 | 0.79    | 0.00 | 0.74 | 0.42  | 0.89   | 0.68  | 1.00 | 0.05  |
| Gammaproteobacteria    | 0.47 | 0.79 | 0.89  | 0.63 | 0.53  | 1.00 | 0.32   | 0.84 | 0.95  | 0.37  | 0.68 | 0.58 | 0.05    | 0.21 | 0.16 | 0.42  | 0.26   | 0.11  | 0.74 | 0.00  |
| Erysipelotrichi        | 0.47 | 0.32 | 0.95  | 0.16 | 1.00  | 0.89 | 0.37   | 0.00 | 0.21  | 0.84  | 0.05 | 0.79 | 0.53    | 0.63 | 0.26 | 0.68  | 0.74   | 0.11  | 0.58 | 0.42  |
| Spirochaetia           | 0.00 | 0.32 | 0.63  | 0.58 | 1.00  | 0.68 | 0.05   | 0.21 | 0.26  | 0.74  | 0.47 | 0.95 | 0.84    | 0.16 | 0.53 | 0.42  | 0.89   | 0.11  | 0.37 | 0.79  |
| Bacteroidia            | 0.58 | 0.74 | 0.11  | 0.79 | 0.26  | 0.00 | 0.95   | 0.63 | 0.53  | 0.42  | 0.68 | 0.37 | 0.16    | 0.89 | 0.47 | 0.32  | 0.05   | 1.00  | 0.21 | 0.84  |
| Negativicutes          | 0.11 | 0.84 | 0.95  | 0.21 | 0.00  | 1.00 | 0.47   | 0.74 | 0.53  | 0.05  | 0.79 | 0.42 | 0.58    | 0.37 | 0.89 | 0.68  | 0.63   | 0.16  | 0.32 | 0.26  |
| Clostridia             | 0.05 | 0.16 | 0.74  | 0.47 | 0.37  | 0.00 | 0.68   | 0.58 | 0.53  | 0.32  | 0.26 | 0.79 | 0.89    | 0.63 | 0.42 | 0.11  | 1.00   | 0.95  | 0.84 | 0.21  |
| Actinobacteria (class) | 0.11 | 0.26 | 0.84  | 0.32 | 1.00  | 0.95 | 0.21   | 0.05 | 0.42  | 0.89  | 0.47 | 0.16 | 0.68    | 0.53 | 0.63 | 0.79  | 0.58   | 0.74  | 0.37 | 0.00  |
| Bacilli                | 0.32 | 0.74 | 1.00  | 0.84 | 0.95  | 0.79 | 0.53   | 0.58 | 0.89  | 0.11  | 0.63 | 0.68 | 0.00    | 0.37 | 0.42 | 0.47  | 0.21   | 0.26  | 0.05 | 0.16  |
| Betaproteobacteria     | 0.95 | 0.84 | 0.79  | 0.26 | 0.32  | 0.58 | 1.00   | 0.89 | 0.11  | 0.42  | 0.74 | 0.21 | 0.37    | 0.16 | 0.47 | 0.63  | 0.53   | 0.00  | 0.68 | 0.05  |

(E)

| PHYLUM         | SAK7 | SK5  | 882RK | LB1  | 976AB | A1   | 1660SH | SH3  | 882AK | 683RD | DB2  | IS8  | 199SUBD | U2   | SOH4 | 976DB | 1660SK | 683PD | AA6  | 199SD |
|----------------|------|------|-------|------|-------|------|--------|------|-------|-------|------|------|---------|------|------|-------|--------|-------|------|-------|
| Bacteroidetes  | 1.00 | 0.58 | 0.05  | 0.84 | 0.26  | 0.00 | 0.95   | 0.63 | 0.42  | 0.53  | 0.68 | 0.37 | 0.16    | 0.79 | 0.47 | 0.32  | 0.11   | 0.89  | 0.21 | 0.74  |
| Fusobacteria   | 0.84 | 0.58 | 0.95  | 0.26 | 0.79  | 1.00 | 0.11   | 0.32 | 0.00  | 0.21  | 0.42 | 0.53 | 0.63    | 0.16 | 0.68 | 0.89  | 0.74   | 0.05  | 0.37 | 0.47  |
| Euryarchaeota  | 0.84 | 0.21 | 0.42  | 0.53 | 0.16  | 1.00 | 0.37   | 0.26 | 0.05  | 0.32  | 0.58 | 0.47 | 0.95    | 0.00 | 0.79 | 0.74  | 0.89   | 0.11  | 0.63 | 0.68  |
| Actinobacteria | 0.32 | 0.21 | 0.68  | 0.37 | 1.00  | 0.95 | 0.11   | 0.05 | 0.16  | 0.84  | 0.47 | 0.42 | 0.89    | 0.26 | 0.74 | 0.63  | 0.79   | 0.53  | 0.58 | 0.00  |
| Proteobacteria | 0.32 | 0.68 | 0.89  | 0.37 | 0.21  | 1.00 | 0.16   | 0.79 | 0.95  | 0.53  | 0.47 | 0.58 | 0.26    | 0.05 | 0.42 | 0.84  | 0.63   | 0.00  | 0.74 | 0.11  |
| Spirochaetes   | 0.58 | 0.11 | 0.47  | 0.37 | 1.00  | 0.74 | 0.00   | 0.21 | 0.05  | 0.68  | 0.32 | 0.95 | 0.89    | 0.16 | 0.53 | 0.63  | 0.79   | 0.26  | 0.42 | 0.84  |
| Synergistetes  | 0.63 | 0.37 | 0.00  | 0.68 | 0.11  | 0.26 | 0.05   | 0.58 | 0.47  | 0.74  | 0.42 | 0.79 | 1.00    | 0.16 | 0.84 | 0.32  | 0.89   | 0.21  | 0.95 | 0.53  |
| Firmicutes     | 0.16 | 0.37 | 1.00  | 0.42 | 0.89  | 0.74 | 0.21   | 0.26 | 0.53  | 0.47  | 0.11 | 0.68 | 0.84    | 0.00 | 0.58 | 0.32  | 0.95   | 0.63  | 0.79 | 0.05  |

Table S6.

## (A) GENUS

| Genus                 | Score1 | Score2 | Score3 | Overall Score | Power (0.05) | Power (0.01) | Reboot Z-value | P     |
|-----------------------|--------|--------|--------|---------------|--------------|--------------|----------------|-------|
| Dorea                 | -0.28  | -0.07  | 0.31   | -0.03         |              |              | 1.07           |       |
| Leuconostoc           | -0.44  | 0.02   | 0.07   | -0.10         |              |              | 0.30           |       |
| Dialister             | -0.19  | 0.08   | 0.13   | 0.17          |              |              | 0.79           |       |
| Succinatimonas        | 0.04   | 0.12   | 0.06   | 0.21          |              |              | 1.48           |       |
| Collinsella           | 0.02   | -0.05  | -0.11  | 0.05          |              |              | 1.42           |       |
| Phascolarctobacterium | 0.25   | 0.26   | 0.09   | 0.38*         | 0.31         | 0.11         | 2.26           | 0.012 |
| Veillonella           | -0.80  | -0.40  | -0.05  | -0.51         | 0.99         | 0.91         | -2.50          | 0.005 |
| Roseburia             | 0.00   | 0.42   | 0.51*  | 0.46          | 0.63         | 0.31         | 1.66           | 0.048 |
| Catenibacterium       | -0.39  | -0.12  | 0.17   | -0.09         |              |              | 0.53           |       |
| Prevotella            | -0.22  | -0.03  | 0.13   | 0.01          |              |              | 0.61           |       |
| Faecalibacterium      | 0.38   | 0.38   | 0.19   | 0.49*         | 0.62         | 0.30         | 2.71           | 0.003 |
| Streptococcus         | -0.70* | -0.58  | -0.21  | -0.60         | 0.97         | 0.89         | -2.07          | 0.019 |
| Shigella              | -0.62  | -0.42  | -0.18  | -0.50         |              |              | -1.48          |       |
| Escherichia           | -0.59* | -0.50  | -0.23  | -0.58         | 0.85         | 0.62         | -1.86          | 0.032 |
| Coprococcus           | 0.03   | 0.22   | 0.14   | 0.32          |              |              | 1.40           |       |
| Butyrivibrio          | 0.17   | 0.45   | 0.38   | 0.52*         | 0.63         | 0.34         | 1.93           | 0.027 |
| Eubacterium           | 0.07   | 0.37   | 0.46   | 0.42          |              |              | 1.55           |       |
| Bifidobacterium       | -0.17  | 0.04   | -0.20  | -0.04         |              |              | 0.91           |       |
| Coprobacillus         | -0.49  | -0.05  | -0.13  | -0.14         |              |              | -0.24          |       |
| Paraprevotella        | -0.49  | -0.13  | 0.25   | -0.13         |              |              | 0.77           |       |
| Mitsuokella           | -0.27  | 0.08   | 0.16   | 0.17          |              |              | 0.70           |       |
| Enterobacter          | -0.75* | -0.25  | 0.20   | -0.35         | 0.97         | 0.89         | -1.86          | 0.032 |
| Lactobacillus         | -0.53  | 0.01   | 0.16   | -0.04         |              |              | 0.57           |       |
| G1                    | 0.07   | 0.46   | 0.38   | 0.53*         | 0.75         | 0.47         | 1.82           | 0.034 |
| G4                    | -0.98  | -0.92  | -0.66  | -0.99         | 1.00         | 1.00         | -1.75          | 0.044 |

## (B) FAMILY

| FAMILY              | Score1 | Score2 | Score3 | Overall Score | Power (0.05) | Power (0.01) | Reboot Z-value | P      |
|---------------------|--------|--------|--------|---------------|--------------|--------------|----------------|--------|
| Veillonellaceae     | -0.42  | -0.19  | 0.06   | -0.30         |              |              | -1.38          |        |
| Porphyromonadaceae  | 0.32   | 0.13   | 0.07   | 0.22          |              |              | 0.96           |        |
| Desulfovibrionaceae | 0.31   | 0.21   | -0.09  | 0.14          | 0.24         | 0.49         | 0.89           |        |
| Bacteroidaceae      | 0.03   | 0.06   | 0.16   | 0.08          |              |              | 0.42           |        |
| Lactobacillaceae    | -0.25  | -0.04  | 0.10   | -0.09         |              |              | -0.68          |        |
| Streptococcaceae    | -0.58  | -0.58  | -0.20  | -0.60*        | 0.76         | 0.51         | -2.25          | 0.0123 |
| Enterobacteriaceae  | -0.56  | -0.53  | -0.23  | -0.62*        | 0.44         | 0.21         | -2.19          | 0.0143 |
| Bifidobacteriaceae  | 0.11   | 0.01   | -0.21  | -0.06         |              |              | -0.61          |        |
| Coriobacteriaceae   | 0.03   | -0.05  | -0.28  | -0.09         |              |              | -0.85          |        |
| Lachnospiraceae     | 0.22   | 0.33   | 0.43   | 0.37          | 0.57         | 0.32         | 1.25           |        |
| Pasteurellaceae     | -0.37  | -0.25  | 0.08   | -0.22         |              |              | -1.14          |        |
| Prevotellaceae      | -0.02  | -0.03  | 0.13   | 0.01          |              |              | 0.39           |        |
| Clostridiaceae      | 0.21   | 0.15   | 0.17   | 0.21          | 0.61         | 0.35         | 0.63           |        |
| Succinivibrionaceae | 0.07   | -0.06  | 0.01   | 0.00          |              |              | 0.25           |        |
| Acidaminococcaceae  | 0.36   | 0.25   | 0.02   | 0.33          |              |              | 1.07           |        |
| Rikenellaceae       | -0.08  | 0.17   | 0.05   | 0.04          |              |              | 0.45           |        |
| Erysipelotrichaceae | -0.12  | -0.02  | -0.14  | -0.08         |              |              | -0.38          |        |
| Eubacteriaceae      | 0.28   | 0.37   | 0.46   | 0.42          | 0.61         | 0.35         | 1.42           |        |
| Ruminococcaceae     | 0.46   | 0.34   | 0.20   | 0.45          | 0.68         | 0.42         | 1.43           |        |
| Sutterellaceae      | -0.48  | -0.36  | 0.04   | -0.40         |              |              | -1.33          |        |
| Leuconostocaceae    | -0.60  | -0.37  | -0.11  | -0.50         |              |              | -2.09          | 0.0184 |

## (C) ORDER

| ORDER              | Score1 | Score2 | Score3 | Overall Score | Power (0.05) | Power (0.01) | Reboot Z-value | P      |
|--------------------|--------|--------|--------|---------------|--------------|--------------|----------------|--------|
| Aeromonadales      | 0.07   | -0.06  | 0.01   | 0.00          |              |              | 0.230          |        |
| Erysipelotrichales | -0.12  | -0.02  | -0.14  | -0.08         |              |              | -0.421         |        |
| Desulfovibrionales | 0.31   | 0.21   | -0.09  | 0.14          |              |              | 0.917          |        |
| Pasteurellales     | -0.37  | -0.25  | 0.08   | -0.22         |              |              | -1.172         |        |
| Selenomonadales    | -0.23  | -0.03  | 0.09   | -0.10         |              |              | -0.684         |        |
| Lactobacillales    | -0.67* | -0.60  | -0.24  | -0.66         | 0.98         | 0.93         | -2.405         | 0.0081 |
| Enterobacteriales  | -0.56  | -0.53  | -0.23  | -0.62*        | 0.85         | 0.65         | -2.209         | 0.0136 |
| Bifidobacteriales  | 0.11   | 0.01   | -0.21  | -0.06         |              |              | -0.595         |        |
| Clostridiales      | 0.26   | 0.33   | 0.37   | 0.39          | 0.67         | 0.41         | 1.106          |        |
| Spirochaetales     | -0.21  | -0.32  | -0.38  | -0.29         |              |              | -1.044         |        |
| Coriobacteriales   | 0.03   | -0.05  | -0.28  | -0.09         |              |              | -0.847         |        |
| Bacteroidales      | -0.01  | -0.02  | 0.13   | 0.03          |              |              | 0.378          |        |
| Burkholderiales    | -0.44  | -0.27  | 0.05   | -0.33         |              |              | -1.351         |        |

## (CLASS)

| CLASS                  | Score1 | Score2 | Score3 | Overall Score | Power (0.05) | Power (0.01) | Reboot Z-value | P      |
|------------------------|--------|--------|--------|---------------|--------------|--------------|----------------|--------|
| Alphaproteobacteria    | -0.18  | -0.04  | -0.04  | -0.11         |              |              | -0.457         |        |
| Deltaproteobacteria    | 0.24   | 0.21   | -0.01  | 0.14          |              |              | 0.727          |        |
| Gammaaproteobacteria   | -0.56  | -0.50  | -0.20  | -0.59*        | 0.79         | 0.56         | -1.962         | 0.0249 |
| Erysipelotrichi        | -0.12  | -0.02  | -0.14  | -0.08         |              |              | -0.384         |        |
| Spirochaetia           | -0.21  | -0.32  | -0.38  | -0.29         |              |              | -1.043         |        |
| Bacteroidia            | -0.01  | -0.02  | 0.13   | 0.03          |              |              | 0.379          |        |
| Negativicutes          | -0.23  | -0.03  | 0.09   | -0.10         |              |              | -0.667         |        |
| Clostridia             | 0.26   | 0.33   | 0.37   | 0.39          | 0.67         | 0.41         | 1.122          |        |
| Actinobacteria (class) | 0.20   | 0.08   | -0.25  | 0.01          |              |              | -0.743         |        |
| Bacilli                | -0.67  | -0.60  | -0.25  | -0.67         | 0.98         | 0.93         | -2.414         | 0.0079 |
| Betaproteobacteria     | -0.58* | -0.45  | -0.09  | -0.56         | 0.67         | 0.41         | -1.803         | 0.0357 |

(F) PHYLUM

| PHYLUM         | Score1 | Score2 | Score3 | Overall Score | Power (0.05) | Power (0.01) | Reboot Z-value | P |
|----------------|--------|--------|--------|---------------|--------------|--------------|----------------|---|
| Bacteroidetes  | -0.11  | -0.13  | 0.05   | -0.10         |              |              | -0.324         |   |
| Fusobacteria   | -0.25  | -0.14  | -0.17  | -0.23         |              |              | -0.773         |   |
| Euryarchaeota  | 0.11   | 0.22   | -0.05  | 0.16          |              |              | 0.731          |   |
| Actinobacteria | 0.17   | 0.12   | -0.22  | 0.05          |              |              | -0.593         |   |
| Proteobacteria | -0.23  | -0.18  | -0.06  | -0.23         |              |              | -0.689         |   |
| Spirochaetes   | 0.18   | 0.20   | -0.13  | 0.19          |              |              | 0.622          |   |
| Synergistetes  | 0.35   | 0.27   | 0.10   | 0.35          |              |              | 1.105          |   |
| Firmicutes     | 0.10   | 0.04   | -0.09  | 0.00          |              |              | 0.308          |   |

Table S7.

(A)

| <b>Feature</b> | <b>P-value (uncorrected)</b> | <b>Corrected P-value (&lt;0.1)</b> | <b>Post-hoc test (Tukey-Kramer) [95%CI;P-value&lt;0.05]</b> | <b>Effect size( Eta-squared)</b> |
|----------------|------------------------------|------------------------------------|-------------------------------------------------------------|----------------------------------|
| G1             | 5.75e-4                      | 6.90e-3                            | AH>SM                                                       | 0.584                            |
| Streptococcus  | 3.05e-4                      | 7.32e-3                            | SM>AH,SM>BL                                                 | 0.614                            |
| Escherichia    | 4.07e-3                      | 0.033                              | SM>AH                                                       | 0.477                            |
| Shigella       | 0.013                        | 0.081                              | SM>AH                                                       | 0.398                            |
| Enterobacter   | 0.022                        | 0.087                              | SM>AH                                                       | 0.363                            |

(B)

| <b>Feature</b> | <b>P-value (uncorrected)</b> | <b>Corrected P-value (&lt;0.1)</b> | <b>Effect size (Eta-squared)</b> | <b>Post-hoc test (Tukey-Kramer) [95%CI;P-value&lt;0.05]</b> |
|----------------|------------------------------|------------------------------------|----------------------------------|-------------------------------------------------------------|
| Escherichia    | 3.53e-3                      | 0.028                              | 0.477                            | SM>AH                                                       |
| Streptococcus  | 2.59e-3                      | 0.031                              | 0.614                            | SM>AH,SM>BL                                                 |
| G1             | 1.56e-3                      | 0.038                              | 0.584                            | AH>SM                                                       |
| Veillonella    | 0.015                        | 0.088                              | 0.364                            | SM>AH                                                       |
| Shigella       | 0.019                        | 0.089                              | 0.398                            | SM>AH                                                       |

Table S8.

| COG     | Category | Annotation                                                                                                        | Z-Score1<br>(Height for<br>age) | Z-Score2<br>(Weight<br>for age) | Z-Score3<br>(Weight for<br>height) | Overall<br>Score | ReBoot<br>Z-Score |
|---------|----------|-------------------------------------------------------------------------------------------------------------------|---------------------------------|---------------------------------|------------------------------------|------------------|-------------------|
| COG2852 | S        | Uncharacterized protein conserved in bacteria                                                                     | 0.65                            | 0.83                            | 0.44                               | 0.80             | 3.25              |
| COG1148 | C        | Heterodisulfide reductase, subunit A and related polyferredoxins                                                  | 0.60                            | 0.67                            | 0.40                               | 0.76             | 2.88              |
| COG0428 | P        | Predicted divalent heavy-metal cations transporter                                                                | 0.53                            | 0.58                            | 0.47                               | 0.69             | 2.85              |
| COG5001 | T        | Predicted signal transduction protein containing a membrane domain, an EAL and a GGDEF domain                     | 0.49                            | 0.66                            | 0.55                               | 0.70             | 2.73              |
| COG2768 | R        | Uncharacterized Fe-S center protein                                                                               | 0.66                            | 0.58                            | 0.27                               | 0.66             | 2.67              |
| COG1657 | I        | Squalene cyclase                                                                                                  | 0.33                            | 0.82                            | 0.60                               | 0.73             | 2.66              |
| COG0404 | E        | Glycine cleavage system T protein (aminomethyltransferase)                                                        | 0.45                            | 0.69                            | 0.54                               | 0.68             | 2.61              |
| COG3387 | G        | Glucosylase and related glycosyl hydrolases                                                                       | 0.40                            | 0.69                            | 0.40                               | 0.58             | 2.47              |
| COG3893 | L        | Inactivated superfamily I helicase                                                                                | 0.40                            | 0.62                            | 0.51                               | 0.65             | 2.46              |
| COG1787 | V        | Predicted endonuclease distantly related to archaeal Holliday junction resolvase and Mrr-like restriction enzymes | 0.44                            | 0.70                            | 0.49                               | 0.65             | 2.45              |
| COG1647 | R        | Esterase/lipase                                                                                                   | 0.52                            | 0.51                            | 0.19                               | 0.55             | 2.44              |
| COG4231 | C        | Indolepyruvate ferredoxin oxidoreductase, alpha and beta subunits                                                 | 0.65                            | 0.40                            | 0.15                               | 0.54             | 2.41              |



|         |    |                                                                                                        |      |      |       |      |      |
|---------|----|--------------------------------------------------------------------------------------------------------|------|------|-------|------|------|
| COG3320 | Q  | Putative dehydrogenase domain of multifunctional non-ribosomal peptide synthetases and related enzymes | 0.44 | 0.66 | 0.45  | 0.63 | 2.39 |
| COG1003 | E  | Glycine cleavage system protein P (pyridoxal-binding), C-terminal domain                               | 0.44 | 0.57 | 0.51  | 0.63 | 2.37 |
| COG4088 | F  | Predicted nucleotide kinase                                                                            | 0.37 | 0.48 | 0.15  | 0.42 | 2.33 |
| COG0782 | K  | Transcription elongation factor                                                                        | 0.59 | 0.54 | 0.19  | 0.59 | 2.31 |
| COG3191 | EQ | L-aminopeptidase/D-esterase                                                                            | 0.62 | 0.33 | 0.03  | 0.47 | 2.30 |
| COG3199 | S  | Uncharacterized conserved protein                                                                      | 0.32 | 0.62 | 0.45  | 0.58 | 2.30 |
| COG0499 | H  | S-adenosylhomocysteine hydrolase                                                                       | 0.32 | 0.50 | 0.27  | 0.46 | 2.27 |
| COG3828 | S  | Uncharacterized protein conserved in bacteria                                                          | 0.42 | 0.59 | 0.49  | 0.65 | 2.26 |
| COG4927 | R  | Predicted choloylglycine hydrolase                                                                     | 0.66 | 0.51 | -0.06 | 0.51 | 2.26 |
| COG4941 | K  | Predicted RNA polymerase sigma factor containing a TPR repeat domain                                   | 0.60 | 0.63 | 0.32  | 0.62 | 2.25 |
| COG4094 | S  | Predicted membrane protein                                                                             | 0.06 | 0.38 | 0.58  | 0.33 | 2.22 |
| COG4747 | R  | ACT domain-containing protein                                                                          | 0.64 | 0.54 | 0.28  | 0.62 | 2.21 |
| COG2152 | G  | Predicted glycosylase                                                                                  | 0.39 | 0.63 | 0.58  | 0.65 | 2.19 |
| COG3267 | U  | Type II secretory pathway, component ExeA (predicted ATPase)                                           | 0.40 | 0.43 | 0.38  | 0.53 | 2.17 |
| COG1083 | M  | CMP-N-acetylneuraminic acid synthetase                                                                 | 0.47 | 0.64 | 0.44  | 0.64 | 2.17 |
| COG1384 | J  | Lysyl-tRNA synthetase (class I)                                                                        | 0.35 | 0.65 | 0.47  | 0.66 | 2.16 |
| COG1492 | H  | Cobyric acid synthase                                                                                  | 0.46 | 0.52 | 0.35  | 0.61 | 2.15 |
| COG1633 | S  | Uncharacterized conserved protein                                                                      | 0.60 | 0.59 | 0.14  | 0.57 | 2.15 |

|         |    |                                                                                             |      |      |       |      |      |
|---------|----|---------------------------------------------------------------------------------------------|------|------|-------|------|------|
| COG4753 | T  | Response regulator containing CheY-like receiver domain and AraC-type DNA-binding domain    | 0.14 | 0.59 | 0.64  | 0.49 | 2.14 |
| COG3746 | P  | Phosphate-selective porin                                                                   | 0.32 | 0.50 | 0.44  | 0.53 | 2.13 |
| COG1228 | Q  | Imidazolonepropionase and related amidohydrolases                                           | 0.37 | 0.55 | 0.49  | 0.60 | 2.13 |
| COG2114 | T  | Adenylate cyclase, family 3 (some proteins contain HAMP domain)                             | 0.35 | 0.56 | 0.26  | 0.50 | 2.12 |
| COG1474 | LO | Cdc6-related protein, AAA superfamily ATPase                                                | 0.56 | 0.54 | -0.02 | 0.48 | 2.12 |
| COG1244 | R  | Predicted Fe-S oxidoreductase                                                               | 0.26 | 0.62 | 0.40  | 0.55 | 2.12 |
| COG1082 | G  | Sugar phosphate isomerases/epimerases                                                       | 0.52 | 0.64 | 0.38  | 0.62 | 2.11 |
| COG2210 | S  | Uncharacterized conserved protein                                                           | 0.59 | 0.36 | -0.06 | 0.41 | 2.09 |
| COG3883 | S  | Uncharacterized protein conserved in bacteria                                               | 0.35 | 0.39 | 0.06  | 0.40 | 2.09 |
| COG2158 | R  | Uncharacterized protein containing a Zn-finger-like domain                                  | 0.64 | 0.51 | 0.25  | 0.61 | 2.07 |
| COG1179 | H  | Dinucleotide-utilizing enzymes involved in molybdopterin and thiamine biosynthesis family 1 | 0.40 | 0.60 | 0.51  | 0.63 | 2.07 |
| COG4359 | E  | Uncharacterized conserved protein, possibly involved in methylthioadenosine recycling       | 0.41 | 0.59 | 0.30  | 0.51 | 2.06 |
| COG3862 | S  | Uncharacterized protein with conserved CXXC pairs                                           | 0.43 | 0.49 | 0.34  | 0.55 | 2.06 |
| COG0326 | O  | Molecular chaperone, HSP90 family                                                           | 0.51 | 0.58 | 0.37  | 0.65 | 2.05 |
| COG2929 | S  | Uncharacterized protein conserved in bacteria                                               | 0.15 | 0.53 | 0.39  | 0.39 | 2.05 |
| COG1664 | M  | Integral membrane protein CcmA involved in cell shape determination                         | 0.47 | 0.63 | 0.32  | 0.57 | 2.04 |

|         |    |                                                                       |       |      |       |      |      |
|---------|----|-----------------------------------------------------------------------|-------|------|-------|------|------|
| COG1060 | HR | Thiamine biosynthesis enzyme ThiH and related uncharacterized enzymes | 0.12  | 0.51 | 0.64  | 0.47 | 2.02 |
| COG2836 | S  | Uncharacterized conserved protein                                     | -0.05 | 0.49 | 0.41  | 0.34 | 2.02 |
| COG4252 | T  | Predicted transmembrane sensor domain                                 | 0.37  | 0.58 | 0.34  | 0.52 | 2.02 |
| COG3315 | Q  | O-Methyltransferase involved in polyketide biosynthesis               | 0.54  | 0.57 | 0.37  | 0.65 | 2.01 |
| COG2851 | C  | H <sup>+</sup> /citrate symporter                                     | 0.65  | 0.34 | 0.11  | 0.46 | 2.01 |
| COG2899 | S  | Uncharacterized protein conserved in bacteria                         | 0.46  | 0.63 | 0.55  | 0.70 | 2.01 |
| COG4898 | S  | Uncharacterized protein conserved in bacteria                         | 0.54  | 0.47 | 0.21  | 0.58 | 2.01 |
| COG5616 | S  | Predicted integral membrane protein                                   | 0.58  | 0.30 | -0.27 | 0.34 | 2.00 |
| COG4209 | G  | ABC-type polysaccharide transport system, permease component          | 0.43  | 0.53 | 0.35  | 0.55 | 1.98 |
| COG4630 | F  | Xanthine dehydrogenase, iron-sulfur cluster and FAD-binding subunit A | 0.35  | 0.52 | 0.26  | 0.52 | 1.98 |
| COG0070 | E  | Glutamate synthase domain 3                                           | 0.55  | 0.47 | 0.23  | 0.56 | 1.97 |
| COG1351 | F  | Predicted alternative thymidylate synthase                            | 0.29  | 0.44 | 0.27  | 0.46 | 1.96 |
| COG1724 | N  | Predicted periplasmic or secreted lipoprotein                         | 0.54  | 0.35 | 0.11  | 0.48 | 1.95 |
| COG1061 | KL | DNA or RNA helicases of superfamily II                                | 0.35  | 0.42 | 0.44  | 0.53 | 1.95 |
| COG1963 | S  | Uncharacterized protein conserved in bacteria                         | 0.41  | 0.49 | 0.27  | 0.47 | 1.95 |
| COG2602 | V  | Beta-lactamase class D                                                | 0.23  | 0.54 | 0.56  | 0.56 | 1.93 |
| COG1908 | C  | Coenzyme F420-reducing hydrogenase, delta subunit                     | 0.61  | 0.56 | 0.28  | 0.67 | 1.92 |
| COG0338 | L  | Site-specific DNA methylase                                           | 0.54  | 0.36 | 0.08  | 0.42 | 1.92 |

Table S9.

| COG     | Category | Annotation                                                                   | Z-Score1<br>(Height for<br>age) | Z-Score2<br>(Weight<br>for age) | Z-Score3<br>(Weight for<br>height) | Overall<br>Score | ReBoot<br>Z-Score |
|---------|----------|------------------------------------------------------------------------------|---------------------------------|---------------------------------|------------------------------------|------------------|-------------------|
| COG4481 | S        | Uncharacterized protein conserved in bacteria                                | -0.18                           | -0.52                           | -0.76                              | -0.55            | -3.55             |
| COG0681 | U        | Signal peptidase I                                                           | -0.58                           | -0.72                           | -0.26                              | -0.66            | -3.35             |
| COG2960 | S        | Uncharacterized protein conserved in bacteria                                | -0.63                           | -0.60                           | -0.24                              | -0.71            | -3.11             |
| COG0569 | P        | K <sup>+</sup> transport systems, NAD-binding component                      | -0.16                           | -0.64                           | -0.51                              | -0.48            | -2.87             |
| COG4940 | U        | Competence protein ComGF                                                     | -0.50                           | -0.67                           | -0.47                              | -0.69            | -2.86             |
| COG3647 | S        | Predicted membrane                                                           | -0.54                           | -0.49                           | -0.22                              | -0.59            | -2.80             |
| COG3104 | E        | Dipeptide/tripeptide                                                         | -0.60                           | -0.67                           | -0.37                              | -0.73            | -2.77             |
| COG4924 | S        | Uncharacterized protein conserved in bacteria                                | -0.27                           | -0.68                           | -0.58                              | -0.67            | -2.73             |
| COG2893 | G        | Phosphotransferase system, mannose/fructose-specific component IIA           | -0.56                           | -0.56                           | -0.30                              | -0.63            | -2.73             |
| COG3965 | P        | Predicted Co/Zn/Cd cation transporters                                       | -0.62                           | -0.25                           | 0.07                               | -0.37            | -2.71             |
| COG3522 | S        | Uncharacterized protein conserved in bacteria                                | -0.56                           | -0.51                           | -0.19                              | -0.60            | -2.68             |
| COG3700 | R        | Acid phosphatase (class B)                                                   | -0.41                           | -0.64                           | -0.52                              | -0.68            | -2.68             |
| COG3455 | S        | Uncharacterized protein conserved in bacteria                                | -0.59                           | -0.61                           | -0.33                              | -0.70            | -2.66             |
| COG4469 | R        | Competence protein                                                           | -0.55                           | -0.53                           | -0.24                              | -0.60            | -2.66             |
| COG4133 | O        | ABC-type transport system involved in cytochrome c biogenesis, ATPase        | -0.62                           | -0.60                           | -0.27                              | -0.68            | -2.66             |
| COG5571 | N        | Autotransporter protein or domain, integral membrane beta-barrel involved in | -0.61                           | -0.54                           | -0.21                              | -0.63            | -2.60             |
| COG4215 | E        | ABC-type arginine transport system, permease                                 | -0.53                           | -0.54                           | -0.26                              | -0.62            | -2.57             |
| COG1025 | O        | Secreted/periplasmic Zn-dependent peptidases,                                | -0.41                           | -0.50                           | -0.28                              | -0.58            | -2.57             |
| COG2814 | G        | Arabinose efflux permease                                                    | -0.53                           | -0.62                           | -0.32                              | -0.67            | -2.56             |
| COG4150 | P        | ABC-type sulfate transport system, periplasmic                               | -0.44                           | -0.52                           | -0.36                              | -0.57            | -2.55             |
| COG2044 | R        | Predicted peroxiredoxins                                                     | -0.71                           | -0.56                           | -0.18                              | -0.69            | -2.54             |
| COG3539 | NU       | P pilus assembly protein,                                                    | -0.57                           | -0.49                           | -0.16                              | -0.60            | -2.51             |
| COG4128 | R        | Zonula occludens toxin                                                       | -0.59                           | -0.41                           | -0.12                              | -0.57            | -2.51             |

|         |      |                                                                                |       |       |       |       |       |
|---------|------|--------------------------------------------------------------------------------|-------|-------|-------|-------|-------|
| COG0271 | T    | Stress-induced morphogen (activity unknown)                                    | -0.60 | -0.38 | -0.02 | -0.44 | -2.50 |
| COG3154 | I    | Putative lipid carrier protein                                                 | -0.61 | -0.47 | -0.12 | -0.58 | -2.49 |
| COG3196 | S    | Uncharacterized protein conserved in bacteria                                  | -0.60 | -0.36 | 0.01  | -0.48 | -2.48 |
| COG2514 | R    | Predicted ring-cleavage extradiol dioxygenase                                  | -0.57 | -0.59 | -0.29 | -0.66 | -2.46 |
| COG0387 | P    | Ca <sup>2+</sup> /H <sup>+</sup> antiporter                                    | -0.41 | -0.49 | -0.29 | -0.54 | -2.44 |
| COG3499 | R    | Phage protein U                                                                | -0.45 | -0.45 | -0.25 | -0.53 | -2.42 |
| COG0778 | C    | Nitroreductase                                                                 | -0.39 | -0.59 | -0.26 | -0.51 | -2.42 |
| COG3121 | NU   | P pilus assembly protein, chaperone PapD                                       | -0.54 | -0.51 | -0.21 | -0.58 | -2.41 |
| COG1133 | I    | ABC-type long-chain fatty acid transport system, fused permease and ATPase     | -0.56 | -0.37 | -0.03 | -0.47 | -2.40 |
| COG0477 | GEPR | Permeases of the major facilitator superfamily                                 | -0.53 | -0.61 | -0.35 | -0.68 | -2.40 |
| COG4220 | L    | Phage DNA packaging protein, Nu1 subunit of                                    | -0.59 | -0.49 | -0.12 | -0.60 | -2.39 |
| COG3015 | MP   | Uncharacterized lipoprotein NlpE involved in copper                            | -0.51 | -0.46 | -0.25 | -0.57 | -2.36 |
| COG2916 | R    | DNA-binding protein H-NS                                                       | -0.48 | -0.54 | -0.33 | -0.60 | -2.36 |
| COG4640 | S    | Predicted membrane                                                             | -0.41 | -0.51 | -0.38 | -0.51 | -2.35 |
| COG2367 | V    | Beta-lactamase class A                                                         | -0.66 | -0.38 | -0.09 | -0.52 | -2.31 |
| COG4943 | T    | Predicted signal transduction protein                                          | -0.52 | -0.49 | -0.19 | -0.56 | -2.31 |
| COG3055 | S    | Uncharacterized protein conserved in bacteria                                  | -0.46 | -0.59 | -0.31 | -0.58 | -2.30 |
| COG3109 | T    | Activator of osmoprotectant transporter ProP                                   | -0.46 | -0.52 | -0.29 | -0.61 | -2.30 |
| COG3061 | M    | Cell envelope opacity-associated protein A                                     | -0.48 | -0.49 | -0.21 | -0.54 | -2.28 |
| COG1621 | G    | Beta-fructosidases (levanase/invertase)                                        | -0.53 | -0.55 | -0.12 | -0.51 | -2.28 |
| COG3456 | T    | Uncharacterized conserved protein, contains FHA                                | -0.46 | -0.62 | -0.38 | -0.63 | -2.28 |
| COG3232 | E    | 5-carboxymethyl-2-hydroxyruconate isomerase                                    | -0.58 | -0.34 | 0.00  | -0.48 | -2.27 |
| COG5281 | S    | Phage-related minor tail                                                       | -0.53 | -0.48 | -0.15 | -0.55 | -2.27 |
| COG4537 | U    | Competence protein ComGC                                                       | -0.57 | -0.52 | -0.25 | -0.64 | -2.26 |
| COG5655 | L    | Plasmid rolling circle replication initiator protein and truncated derivatives | -0.47 | -0.51 | -0.41 | -0.64 | -2.26 |
| COG3720 | P    | Putative heme degradation                                                      | -0.43 | -0.58 | -0.31 | -0.52 | -2.26 |
| COG3477 | S    | Predicted periplasmic/secreted                                                 | -0.57 | -0.49 | -0.18 | -0.57 | -2.26 |
| COG3256 | P    | Nitric oxide reductase large                                                   | -0.66 | -0.28 | 0.12  | -0.46 | -2.25 |

|         |    |                                                                             |       |       |       |       |       |
|---------|----|-----------------------------------------------------------------------------|-------|-------|-------|-------|-------|
| COG3692 | S  | Uncharacterized protein conserved in bacteria                               | -0.57 | -0.55 | -0.22 | -0.65 | -2.24 |
| COG3161 | H  | 4-hydroxybenzoate synthetase (chorismate                                    | -0.45 | -0.44 | -0.23 | -0.54 | -2.24 |
| COG3137 | M  | Putative salt-induced outer membrane protein                                | -0.32 | -0.51 | -0.37 | -0.58 | -2.23 |
| COG2706 | G  | 3-carboxymuconate cyclase                                                   | -0.53 | -0.62 | -0.37 | -0.60 | -2.23 |
| COG4571 | M  | Outer membrane protease                                                     | -0.56 | -0.61 | -0.10 | -0.61 | -2.23 |
| COG3311 | K  | Predicted transcriptional                                                   | -0.47 | -0.46 | -0.23 | -0.56 | -2.21 |
| COG3697 | HI | Phosphoribosyl-dephospho-CoA transferase (holo-ACP                          | -0.09 | -0.46 | -0.60 | -0.47 | -2.21 |
| COG4733 | S  | Phage-related protein, tail component                                       | -0.61 | -0.54 | -0.19 | -0.62 | -2.20 |
| COG5464 | S  | Uncharacterized conserved                                                   | -0.43 | -0.56 | -0.43 | -0.58 | -2.18 |
| COG2269 | J  | Truncated, possibly inactive, lysyl-tRNA synthetase (class                  | -0.53 | -0.39 | -0.10 | -0.45 | -2.17 |
| COG2959 | H  | Uncharacterized enzyme of heme biosynthesis                                 | -0.51 | -0.52 | -0.26 | -0.59 | -2.17 |
| COG3425 | I  | 3-hydroxy-3-methylglutaryl CoA synthase                                     | -0.58 | -0.51 | -0.20 | -0.55 | -2.16 |
| COG3579 | E  | Aminopeptidase C                                                            | -0.27 | -0.57 | -0.38 | -0.50 | -2.16 |
| COG2193 | P  | Bacterioferritin (cytochrome                                                | -0.01 | -0.32 | -0.48 | -0.30 | -2.15 |
| COG3769 | R  | Predicted hydrolase (HAD superfamily)                                       | -0.43 | -0.53 | -0.42 | -0.59 | -2.15 |
| COG1272 | R  | Predicted membrane protein, hemolysin III                                   | -0.34 | -0.54 | -0.20 | -0.48 | -2.15 |
| COG3086 | T  | Positive regulator of sigma E                                               | -0.38 | -0.42 | -0.25 | -0.51 | -2.15 |
| COG0179 | Q  | 2-keto-4-pentenoate hydratase/2-oxohepta-3-ene 1,7-dioic acid hydratase     | -0.47 | -0.52 | -0.03 | -0.48 | -2.14 |
| COG0596 | R  | Predicted hydrolases or acyltransferases (alpha/beta hydrolase superfamily) | -0.63 | -0.57 | -0.25 | -0.64 | -2.13 |
| COG3151 | S  | Uncharacterized protein conserved in bacteria                               | -0.65 | -0.53 | -0.14 | -0.63 | -2.13 |
| COG3272 | S  | Uncharacterized conserved                                                   | -0.39 | -0.37 | -0.17 | -0.44 | -2.12 |
| COG3520 | S  | Uncharacterized protein conserved in bacteria                               | -0.40 | -0.44 | -0.21 | -0.49 | -2.12 |
| COG3819 | S  | Predicted membrane                                                          | -0.69 | -0.45 | -0.12 | -0.59 | -2.12 |
| COG4533 | R  | ABC-type uncharacterized transport system,                                  | -0.50 | -0.51 | -0.26 | -0.56 | -2.12 |
| COG5455 | S  | Predicted integral membrane protein                                         | -0.43 | -0.42 | -0.20 | -0.52 | -2.11 |
| COG3085 | S  | Uncharacterized protein conserved in bacteria                               | -0.64 | -0.16 | 0.13  | -0.32 | -2.11 |
| COG4138 | H  | ABC-type cobalamin transport system, ATPase                                 | -0.53 | -0.53 | -0.22 | -0.62 | -2.11 |

|         |     |                                                                              |       |       |       |       |       |
|---------|-----|------------------------------------------------------------------------------|-------|-------|-------|-------|-------|
| COG3316 | L   | Transposase and inactivated derivatives                                      | -0.56 | -0.44 | -0.11 | -0.55 | -2.11 |
| COG1658 | L   | Small primase-like proteins (Toprim domain)                                  | -0.52 | -0.51 | -0.27 | -0.55 | -2.11 |
| COG4950 | S   | Uncharacterized protein conserved in bacteria                                | -0.48 | -0.47 | -0.20 | -0.56 | -2.11 |
| COG0693 | R   | Putative intracellular protease/amidase                                      | -0.62 | -0.52 | -0.22 | -0.56 | -2.10 |
| COG1280 | E   | Putative threonine efflux                                                    | -0.39 | -0.42 | -0.16 | -0.48 | -2.09 |
| COG3149 | U   | Type II secretory pathway, component PulM                                    | -0.62 | -0.43 | -0.11 | -0.60 | -2.09 |
| COG1444 | R   | Predicted P-loop ATPase fused to an                                          | -0.45 | -0.45 | -0.20 | -0.52 | -2.08 |
| COG2128 | S   | Uncharacterized conserved                                                    | -0.45 | -0.46 | -0.32 | -0.52 | -2.07 |
| COG3355 | K   | Predicted transcriptional                                                    | -0.47 | -0.36 | -0.16 | -0.48 | -2.06 |
| COG5512 | R   | Zn-ribbon-containing, possibly RNA-binding protein and truncated derivatives | -0.60 | -0.45 | -0.17 | -0.60 | -2.05 |
| COG3683 | R   | ABC-type uncharacterized transport system,                                   | -0.57 | -0.34 | -0.05 | -0.43 | -2.05 |
| COG5339 | S   | Uncharacterized protein conserved in bacteria                                | -0.49 | -0.43 | -0.18 | -0.50 | -2.05 |
| COG3709 | P   | Uncharacterized component of phosphonate metabolism                          | -0.47 | -0.31 | -0.04 | -0.43 | -2.04 |
| COG2901 | KL  | Factor for inversion stimulation Fis,                                        | -0.63 | -0.37 | -0.09 | -0.49 | -2.04 |
| COG3087 | D   | Cell division protein                                                        | -0.45 | -0.37 | -0.15 | -0.44 | -2.04 |
| COG3624 | P   | Uncharacterized enzyme of phosphonate metabolism                             | -0.42 | -0.45 | -0.26 | -0.54 | -2.03 |
| COG4778 | P   | ABC-type phosphonate transport system, ATPase                                | -0.53 | -0.45 | -0.16 | -0.56 | -2.03 |
| COG3454 | P   | Metal-dependent hydrolase involved in phosphonate metabolism                 | -0.54 | -0.38 | 0.01  | -0.47 | -2.02 |
| COG4671 | R   | Predicted glycosyl                                                           | -0.34 | -0.54 | -0.26 | -0.45 | -2.02 |
| COG3850 | T   | Signal transduction histidine kinase, nitrate/nitrite-                       | -0.47 | -0.48 | -0.24 | -0.52 | -2.02 |
| COG2198 | T   | FOG: HPt domain                                                              | -0.58 | -0.49 | -0.15 | -0.57 | -2.02 |
| COG0376 | P   | Catalase (peroxidase I)                                                      | -0.52 | -0.52 | -0.23 | -0.59 | -2.01 |
| COG2261 | S   | Predicted membrane                                                           | -0.64 | -0.52 | -0.24 | -0.66 | -2.01 |
| COG4672 | S   | Phage-related protein                                                        | -0.61 | -0.42 | -0.01 | -0.52 | -2.00 |
| COG1940 | KG  | Transcriptional regulator/sugar kinase                                       | -0.53 | -0.60 | -0.27 | -0.60 | -2.00 |
| COG0513 | LKJ | Superfamily II DNA and RNA helicases                                         | -0.23 | -0.54 | -0.40 | -0.52 | -2.00 |
| COG4892 | R   | Predicted heme/steroid binding protein                                       | 0.06  | -0.26 | -0.46 | -0.23 | -2.00 |

|         |   |                                                                        |       |       |       |       |       |
|---------|---|------------------------------------------------------------------------|-------|-------|-------|-------|-------|
| COG3778 | S | Uncharacterized protein conserved in bacteria                          | -0.65 | -0.58 | -0.18 | -0.64 | -2.00 |
| COG5383 | S | Uncharacterized protein conserved in bacteria                          | -0.55 | -0.42 | -0.09 | -0.52 | -2.00 |
| COG1670 | J | Acetyltransferases, including N-acetylases of ribosomal                | -0.45 | -0.41 | -0.09 | -0.45 | -1.99 |
| COG1914 | P | Mn <sup>2+</sup> and Fe <sup>2+</sup> transporters of the NRAMP family | -0.59 | -0.51 | -0.20 | -0.58 | -1.99 |
| COG0771 | M | UDP-N-acetylmuramoylalanine-D-                                         | -0.52 | -0.46 | 0.05  | -0.39 | -1.99 |
| COG3013 | S | Uncharacterized conserved                                              | -0.49 | -0.46 | -0.21 | -0.56 | -1.97 |
| COG0770 | M | UDP-N-acetylmuramyl pentapeptide synthase                              | -0.24 | -0.53 | -0.34 | -0.45 | -1.97 |



**Table S10.**

| <b>Group1</b> | <b>Group2</b> | <b>Group3</b> | <b>Group4</b> | <b>Group5</b> | <b>Group6</b> | <b>Group7</b> | <b>Group8</b> | <b>Group9</b> |
|---------------|---------------|---------------|---------------|---------------|---------------|---------------|---------------|---------------|
| GH24          | GT55          | PL13          | GH44          | GH101         | GT4           | GH85          | CE7           | GH127         |
| GH128         | GT9           | GH91          | GH12          | GT22          | GH36          | GT11          | PL11          | CE1           |
| PL12          | GT77          | GH15          | GH58          | GT43          | GT2           | GH123         | GH35          | GH8           |
| PL15          | GH104         | GH76          | PL3           | GT25          | GT28          | GH108         | CE12          | GH64          |
| GT17          | GT73          | GT23          | GH116         | GH23          | GT35          | PL17          | GH30          | CE3           |
| GH14          | GT52          | GH63          | CE13          | GH4           | GT5           | GT72          | GH73          | GT82          |
| GH48          | PL14          | GH50          | GT39          | GT74          | CE4           |               | GH16          | GH98          |
| GT83          | GH17          | GT26          | GH74          | GT60          | GH5           |               |               | CE11          |
| GH113         | GH19          | GH79          | GT10          | GH13          | GH77          |               |               | GT19          |
| GH114         | GH53          | PL21          | GH47          | GT13          | GH26          |               |               | PL1           |
| GH112         | GH1           | GH75          | GT48          | GT76          | GH32          |               |               | PL10          |
| GH39          | GT14          | GH33          | CE15          | CE14          | PL9           |               |               | GH88          |
| GH6           | GH25          | GH62          | GT6           | GH38          | GH66          |               |               | GH105         |
| GH9           | GT1           | GH117         | PL7           | GT31          |               |               |               | CE8           |
| GT32          | GT84          | PL22          |               | GH11          |               |               |               | GH92          |
| GH93          | GH65          | GT87          |               | GT80          |               |               |               | GH130         |
| PL8           | CE9           | GT81          |               | GH103         |               |               |               | GH29          |
| GH99          | GH42          | GH110         |               | GT56          |               |               |               | GH31          |
| CE2           | GT44          |               |               | GH37          |               |               |               | GH94          |
| GT62          | GH102         |               |               | GT20          |               |               |               | GT3           |
| GT66          | GT51          |               |               | CE10          |               |               |               | GH3           |
| GT42          |               |               |               | GT68          |               |               |               | GH57          |
| GT71          |               |               |               | GT90          |               |               |               | GH78          |
| GH71          |               |               |               | GT57          |               |               |               | GH106         |
| GH86          |               |               |               | GT29          |               |               |               | GH115         |
| GH87          |               |               |               | GH129         |               |               |               | CE6           |
| GH120         |               |               |               | GH45          |               |               |               | GT30          |
| GH121         |               |               |               | GT91          |               |               |               | GH28          |
| GH70          |               |               |               | GH18          |               |               |               | GH2           |
| GH68          |               |               |               | GT34          |               |               |               | GH10          |
| GT47          |               |               |               | GT24          |               |               |               | GH67          |
|               |               |               |               | GH55          |               |               |               | GH95          |
|               |               |               |               | GT64          |               |               |               | GH97          |
|               |               |               |               | GT7           |               |               |               | GH43          |
|               |               |               |               | GT33          |               |               |               | GH51          |
|               |               |               |               | GT27          |               |               |               | GH72          |
|               |               |               |               | GT41          |               |               |               | GH27          |
|               |               |               |               | GH59          |               |               |               | GH89          |
|               |               |               |               | GT8           |               |               |               | GH125         |
|               |               |               |               | GH81          |               |               |               | GH84          |
|               |               |               |               | GT69          |               |               |               | GH20          |
|               |               |               |               | GT61          |               |               |               | GH109         |
|               |               |               |               | GT54          |               |               |               |               |
|               |               |               |               | GT49          |               |               |               |               |
|               |               |               |               | GT18          |               |               |               |               |
|               |               |               |               | GT16          |               |               |               |               |
|               |               |               |               | GT12          |               |               |               |               |
|               |               |               |               | GH56          |               |               |               |               |

**Table S11.**

| <b>CAZy Groups</b>   | <b>Nutritional Indices</b> |               |               |                | <b>SIGNIFICANCE</b> |
|----------------------|----------------------------|---------------|---------------|----------------|---------------------|
|                      | <b>SCORE1</b>              | <b>SCORE2</b> | <b>SCORE3</b> | <b>OVERALL</b> |                     |
| <b>Group_1</b>       | 0.069                      | 0.216         | 0.255         | 0.220          |                     |
| <b>Group_2</b>       | -0.131                     | -0.105        | 0.058         | -0.086         |                     |
| <b>Group_3</b>       | 0.259                      | 0.492         | 0.335         | 0.457          | <b>STRONG</b>       |
| <b>Group_4</b>       | 0.117                      | 0.132         | 0.011         | 0.117          |                     |
| <b>Group_5</b>       | -0.223                     | -0.168        | -0.059        | -0.209         |                     |
| <b>Group_6</b>       | 0.237                      | 0.331         | 0.303         | 0.376          | <b>MODERATE</b>     |
| <b>Group_7</b>       | 0.039                      | 0.259         | 0.447         | 0.299          | <b>MODERATE</b>     |
| <b>Group_8</b>       | 0.226                      | 0.278         | 0.219         | 0.316          | <b>MODERATE</b>     |
| <b>Group_9</b>       | -0.109                     | -0.212        | -0.091        | -0.173         |                     |
| <b>Group_3_6_7**</b> | 0.276                      | 0.558         | 0.559         | 0.583          | <b>STRONG</b>       |
